# Supplementary material for: EHMT2 epigenetically suppresses Wnt signaling and is a potential target in embryonal rhabdomyosarcoma
Source: eLife. 2020 Nov 30;9:e57683. doi: 10.7554/eLife.57683 (PMC7728445; doi:10.7554/eLife.57683)
Supplement: Figure 1—source data 1. [file elife-57683-fig1-data1.xlsx]

## Sheet: Sheet1
Figure 1 - Source Data 1
Figure 1B: G9a is overexpressed in ERMS.
Raw Data Table
		HSMM	RD18	JR1	RD
G9a mRNA expression	Biological Replicate 1	0.00230663	0.00708999	0.00430432	0.00505993
		0.00184777	0.00759887	0.00418662	0.00488757
		0.00210787	0.00837323	0.00424506	0.00462392
	Biological Replicate 2	0.00276214	0.00912053	0.0062295	0.00442533
		0.00306478	0.00899497	0.0061013	0.00442533
		0.00317286	0.00957397	0.00614374	0.00484261
	Biological Replicate 3	0.00144973	0.00477594	0.00267422	0.00339274
		0.00161977	0.00461325	0.00254756	0.00371265
		0.00167689	0.00461325	0.00249513	0.00368701
Statistics Summary (GraphPad Prism 8)
Table Analyzed	Data 1
Column B	RD18
vs.	vs.
Column A	HSMM
Unpaired t test
P value	<0.0001
P value summary	****
Significantly different (P < 0.05)?	Yes
One- or two-tailed P value?	Two-tailed
t, df	t=6.966, df=16
How big is the difference?
Mean of column A	0.002223
Mean of column B	0.007195
Difference between means (B - A) ± SEM	0.004972 ± 0.0007137
95% confidence interval	0.003459 to 0.006485
R squared (eta squared)	0.752
F test to compare variances
F, DFn, Dfd	10.04, 8, 8
P value	0.0038
P value summary	**
Significantly different (P < 0.05)?	Yes
Data analyzed
Sample size, column A	9
Sample size, column B	9
Table Analyzed	Data 1
Column C	JR1
vs.	vs.
Column A	HSMM
Unpaired t test
P value	0.0018
P value summary	**
Significantly different (P < 0.05)?	Yes
One- or two-tailed P value?	Two-tailed
t, df	t=3.746, df=16
How big is the difference?
Mean of column A	0.002223
Mean of column C	0.004325
Difference between means (C - A) ± SEM	0.002102 ± 0.0005611
95% confidence interval	0.0009125 to 0.003292
R squared (eta squared)	0.4673
F test to compare variances
F, DFn, Dfd	5.823, 8, 8
P value	0.0223
P value summary	*
Significantly different (P < 0.05)?	Yes
Data analyzed
Sample size, column A	9
Sample size, column C	9
Table Analyzed	Data 1
Column D	RD
vs.	vs.
Column A	HSMM
Unpaired t test
P value	<0.0001
P value summary	****
Significantly different (P < 0.05)?	Yes
One- or two-tailed P value?	Two-tailed
t, df	t=7.209, df=16
How big is the difference?
Mean of column A	0.002223
Mean of column D	0.00434
Difference between means (D - A) ± SEM	0.002117 ± 0.0002936
95% confidence interval	0.001494 to 0.002739
R squared (eta squared)	0.7646
F test to compare variances
F, DFn, Dfd	1.152, 8, 8
P value	0.8459
P value summary	ns
Significantly different (P < 0.05)?	No
Data analyzed
Sample size, column A	9
Sample size, column D	9
