# Supplementary material for: EHMT2 epigenetically suppresses Wnt signaling and is a potential target in embryonal rhabdomyosarcoma
Source: eLife. 2020 Nov 30;9:e57683. doi: 10.7554/eLife.57683 (PMC7728445; doi:10.7554/eLife.57683)
Supplement: Figure 2—source data 1. [file elife-57683-fig2-data1.xlsx]

## Sheet: Sheet1
Figure 2 - Source Data 1
Figure 2C: G9a inhibits differentiation and promotes proliferation of myoblasts.
Raw Data Table		RD18
		siRNA	siG9a
D2 Myogenin mRNA expression	Biological Replicate 1	0.00728932	0.0153034
		0.00723897	0.0154099
		0.00770494	0.016176
	Biological Replicate 2	0.0066305	0.0155171
		0.00705731	0.0149885
		0.0066305	0.0153034
	Biological Replicate 3	0.00783057	0.0158066
		0.00686432	0.014545
		0.00667662	0.0148506
Statistics Summary (GraphPad Prism 8)
Table Analyzed	Data 1
Column B	siG9a
vs.	vs.
Column A	siRNA
Unpaired t test
P value	<0.0001
P value summary	****
Significantly different (P < 0.05)?	Yes
One- or two-tailed P value?	Two-tailed
t, df	t=36.86, df=16
How big is the difference?
Mean of column A	0.007103
Mean of column B	0.01532
Difference between means (B - A) ± SEM	0.008220 ± 0.0002230
95% confidence interval	0.007747 to 0.008692
R squared (eta squared)	0.9884
F test to compare variances
F, DFn, Dfd	1.193, 8, 8
P value	0.8087
P value summary	ns
Significantly different (P < 0.05)?	No
Data analyzed
Sample size, column A	9
Sample size, column B	9
