# Supplementary material for: EHMT2 epigenetically suppresses Wnt signaling and is a potential target in embryonal rhabdomyosarcoma
Source: eLife. 2020 Nov 30;9:e57683. doi: 10.7554/eLife.57683 (PMC7728445; doi:10.7554/eLife.57683)
Supplement: Figure 2—source data 2. [file elife-57683-fig2-data2.xlsx]

## Sheet: Sheet1
Figure 2 - Source Data 2
Figure 2C: G9a inhibits differentiation and promotes proliferation of myoblasts.
Raw Data Table		RD18
		DMSO	UNC0642
D2 Myogenin mRNA expression	Biological Replicate 1	0.00893283	0.0294961
		0.00957397	0.0331848
		0.00918397	0.0363139
	Biological Replicate 2	0.0128093	0.0299078
		0.012459	0.0307486
		0.0126329	0.02909
	Biological Replicate 3	0.0136654	0.0350769
		0.0128389	0.0363139
		0.0133841	0.0363139
Statistics Summary (GraphPad Prism 8)
Table Analyzed	Data 1
Column B	UNC0642
vs.	vs.
Column A	DMSO
Unpaired t test
P value	<0.0001
P value summary	****
Significantly different (P < 0.05)?	Yes
One- or two-tailed P value?	Two-tailed
t, df	t=17.27, df=16
How big is the difference?
Mean of column A	0.01172
Mean of column B	0.03294
Difference between means (B - A) ± SEM	0.02122 ± 0.001228
95% confidence interval	0.01861 to 0.02382
R squared (eta squared)	0.9491
F test to compare variances
F, DFn, Dfd	2.723, 8, 8
P value	0.178
P value summary	ns
Significantly different (P < 0.05)?	No
Data analyzed
Sample size, column A	9
Sample size, column B	9
