# Supplementary material for: EHMT2 epigenetically suppresses Wnt signaling and is a potential target in embryonal rhabdomyosarcoma
Source: eLife. 2020 Nov 30;9:e57683. doi: 10.7554/eLife.57683 (PMC7728445; doi:10.7554/eLife.57683)
Supplement: Figure 2—source data 3. [file elife-57683-fig2-data3.xlsx]

## Sheet: Sheet1
Figure 2 - Source Data 3
Figure 2D: G9a inhibits differentiation and promotes proliferation of myoblasts.
Raw Data Table		RD18
		siRNA	siG9a
BrdU positive percentage	Biological Replicate 1	44.1667	32.9268
		47.5	38.4615
		50	42.4
		46.0317	36.6972
	Biological Replicate 2	53.3333	30.7692
		48.3333	38.806
		46.7742	37.1795
		55.2632	32.6923
	Biological Replicate 3	45.1613	34.6154
		52.381	37.4332
		48.9655	35.1852
		46.5116	29.8969
Statistics Summary (GraphPad Prism 8)
Table Analyzed	Data 1
Column B	siG9a
vs.	vs.
Column A	siRNA
Unpaired t test
P value	<0.0001
P value summary	****
Significantly different (P < 0.05)?	Yes
One- or two-tailed P value?	Two-tailed
t, df	t=9.094, df=22
How big is the difference?
Mean of column A	48.7
Mean of column B	35.59
Difference between means (B - A) ± SEM	-13.11 ± 1.442
95% confidence interval	-16.10 to -10.12
R squared (eta squared)	0.7899
F test to compare variances
F, DFn, Dfd	1.110, 11, 11
P value	0.8662
P value summary	ns
Significantly different (P < 0.05)?	No
Data analyzed
Sample size, column A	12
Sample size, column B	12
