# Supplementary material for: EHMT2 epigenetically suppresses Wnt signaling and is a potential target in embryonal rhabdomyosarcoma
Source: eLife. 2020 Nov 30;9:e57683. doi: 10.7554/eLife.57683 (PMC7728445; doi:10.7554/eLife.57683)
Supplement: Figure 2—source data 4. [file elife-57683-fig2-data4.xlsx]

## Sheet: Sheet1
Figure 2 - Source Data 4
Figure 2D: G9a inhibits differentiation and promotes proliferation of myoblasts.
Raw Data Table		RD18
		DMSO	UNC0642
BrdU positive percentage	Biological Replicate 1	48.3871	30.6122
		51.4706	35.5263
		56.3636	34.4262
		53.0303	34.1772
	Biological Replicate 2	50.3145	30.137
		45.4874	30.8824
		46.7391	26.5152
		48	30
	Biological Replicate 3	48.4496	33.8095
		48.7047	30.094
		59.2437	32.8947
		46.3415	32.9588
Statistics Summary (GraphPad Prism 8)
Table Analyzed	Data 1
Column B	UNC0642
vs.	vs.
Column A	DMSO
Unpaired t test
P value	<0.0001
P value summary	****
Significantly different (P < 0.05)?	Yes
One- or two-tailed P value?	Two-tailed
t, df	t=12.99, df=22
How big is the difference?
Mean of column A	50.21
Mean of column B	31.84
Difference between means (B - A) ± SEM	-18.37 ± 1.414
95% confidence interval	-21.31 to -15.44
R squared (eta squared)	0.8847
F test to compare variances
F, DFn, Dfd	2.662, 11, 11
P value	0.1193
P value summary	ns
Significantly different (P < 0.05)?	No
Data analyzed
Sample size, column A	12
Sample size, column B	12
