# Supplementary material for: EHMT2 epigenetically suppresses Wnt signaling and is a potential target in embryonal rhabdomyosarcoma
Source: eLife. 2020 Nov 30;9:e57683. doi: 10.7554/eLife.57683 (PMC7728445; doi:10.7554/eLife.57683)
Supplement: Figure 3—source data 1. [file elife-57683-fig3-data1.xlsx]

## Sheet: Sheet1
Figure 3 - Source Data 1
Figure 3D: G9a directly regulates DKK1 and Wnt signaling.
Raw Data Table		RD18
		siRNA	siG9a
DKK1 mRNA expression	Biological Replicate 1	0.82932	0.215636
		0.913831	0.218646
		0.926588	0.220166
	Biological Replicate 2	4.64818	2.53737
		4.68051	1.7818
		5.80247	2.45094
	Biological Replicate 3	4.01853	1.65481
		2.94173	1.77358
		3.30962	1.72508
Statistics Summary (GraphPad Prism 8)
Table Analyzed	Data 1
Column B	siG9a
vs.	vs.
Column A	siRNA
Unpaired t test
P value	0.0249
P value summary	*
Significantly different (P < 0.05)?	Yes
One- or two-tailed P value?	Two-tailed
t, df	t=2.476, df=16
How big is the difference?
Mean of column A	3.119
Mean of column B	1.398
Difference between means (B - A) ± SEM	-1.721 ± 0.6953
95% confidence interval	-3.195 to -0.2474
R squared (eta squared)	0.277
F test to compare variances
F, DFn, Dfd	3.942, 8, 8
P value	0.0694
P value summary	ns
Significantly different (P < 0.05)?	No
Data analyzed
Sample size, column A	9
Sample size, column B	9
