# Supplementary material for: EHMT2 epigenetically suppresses Wnt signaling and is a potential target in embryonal rhabdomyosarcoma
Source: eLife. 2020 Nov 30;9:e57683. doi: 10.7554/eLife.57683 (PMC7728445; doi:10.7554/eLife.57683)
Supplement: Figure 3—source data 2. [file elife-57683-fig3-data2.xlsx]

## Sheet: Sheet1
Figure 3 - Source Data 2
Figure 3E: G9a directly regulates DKK1 and Wnt signaling.
Raw Data Table		RD18
		DMSO	UNC0642
DKK1 mRNA expression	Biological Replicate 1	5.85634	2.60268
		5.65685	2.54912
		5.81589	2.37841
	Biological Replicate 2	5.9794	2.78305
		6.06287	2.68825
		3.06666	2.94173
	Biological Replicate 3	6.00709	2.57874
		6.17597	2.4909
		5.60481	2.30804
Statistics Summary (GraphPad Prism 8)
Table Analyzed	Data 1
Column B	UNC0642
vs.	vs.
Column A	DMSO
Unpaired t test
P value	<0.0001
P value summary	****
Significantly different (P < 0.05)?	Yes
One- or two-tailed P value?	Two-tailed
t, df	t=9.146, df=16
How big is the difference?
Mean of column A	5.581
Mean of column B	2.591
Difference between means (B - A) ± SEM	-2.989 ± 0.3269
95% confidence interval	-3.682 to -2.297
R squared (eta squared)	0.8394
F test to compare variances
F, DFn, Dfd	24.08, 8, 8
P value	0.0002
P value summary	***
Significantly different (P < 0.05)?	Yes
Data analyzed
Sample size, column A	9
Sample size, column B	9
