# Supplementary material for: EHMT2 epigenetically suppresses Wnt signaling and is a potential target in embryonal rhabdomyosarcoma
Source: eLife. 2020 Nov 30;9:e57683. doi: 10.7554/eLife.57683 (PMC7728445; doi:10.7554/eLife.57683)
Supplement: Figure 4—source data 1. [file elife-57683-fig4-data1.xlsx]

## Sheet: Sheet1
Figure 4 - Source Data 1
Figure 4C, 4D, 4E: G9a regulates DKK1 expression through Sp1/p300 in a methyltranferase dependent manner.
G9a ChIP on DKK1 promoter
Raw Data Table
		RD18					RD18					RD18
		IgG	G9a				IgG	G9a				IgG	G9a
DKK1 promoter	Biological Replicate 1	0.0628122	2.41249		preDKK1 promoter	Biological Replicate 1	0.1011	0.0928164		postDKK1 promoter	Biological Replicate 1	0.0828812	0.0692131
		0.691207	1.86674				0.0983355	0.094112				0.0706674	0.0602535
		0.710639	2.909				0.113744	0.0909062				0.0721523	0.0582011
	Biological Replicate 2	0.597574	2.52076			Biological Replicate 2	0.0304768	0.0499694			Biological Replicate 2	0.019739	0.0377823
		0.465609	2.73939				0.0388446	0.0510194				0.0213028	0.0375214
		0.581233	2.48605				0.0342882	0.0598373				0.021451	0.0407758
Statistics Summary (GraphPad Prism 8)
Table Analyzed	Data 1				Table Analyzed	Data 2				Table Analyzed	Data 3
Column B	G9a				Column B	G9a				Column B	G9a
vs.	vs.				vs.	vs.				vs.	vs.
Column A	IgG				Column A	IgG				Column A	IgG
Unpaired t test					Unpaired t test					Unpaired t test
P value	<0.0001				P value	0.8445				P value	0.8515
P value summary	****				P value summary	ns				P value summary	ns
Significantly different (P < 0.05)?	Yes				Significantly different (P < 0.05)?	No				Significantly different (P < 0.05)?	No
One- or two-tailed P value?	Two-tailed				One- or two-tailed P value?	Two-tailed				One- or two-tailed P value?	Two-tailed
t, df	t=11.25, df=10				t, df	t=0.2013, df=10				t, df	t=0.1922, df=10
How big is the difference?					How big is the difference?					How big is the difference?
Mean of column A	0.5182				Mean of column A	0.06946				Mean of column A	0.04803
Mean of column B	2.489				Mean of column B	0.07311				Mean of column B	0.05062
Difference between means (B - A) ± SEM	1.971 ± 0.1752				Difference between means (B - A) ± SEM	0.003645 ± 0.01811				Difference between means (B - A) ± SEM	0.002592 ± 0.01349
95% confidence interval	1.581 to 2.361				95% confidence interval	-0.03670 to 0.04399				95% confidence interval	-0.02747 to 0.03265
R squared (eta squared)	0.9268				R squared (eta squared)	0.004037				R squared (eta squared)	0.003679
F test to compare variances					F test to compare variances					F test to compare variances
F, DFn, Dfd	2.203, 5, 5				F, DFn, Dfd	3.193, 5, 5				F, DFn, Dfd	4.875, 5, 5
P value	0.4063				P value	0.2284				P value	0.107
P value summary	ns				P value summary	ns				P value summary	ns
Significantly different (P < 0.05)?	No				Significantly different (P < 0.05)?	No				Significantly different (P < 0.05)?	No
Data analyzed					Data analyzed					Data analyzed
Sample size, column A	6				Sample size, column A	6				Sample size, column A	6
Sample size, column B	6				Sample size, column B	6				Sample size, column B	6
