# Supplementary material for: EHMT2 epigenetically suppresses Wnt signaling and is a potential target in embryonal rhabdomyosarcoma
Source: eLife. 2020 Nov 30;9:e57683. doi: 10.7554/eLife.57683 (PMC7728445; doi:10.7554/eLife.57683)
Supplement: Figure 4—source data 2. [file elife-57683-fig4-data2.xlsx]

## Sheet: Sheet1
Figure 4 - Source Data 2
Figure 4F: G9a regulates DKK1 expression through Sp1/p300 in a methyltranferase dependent manner.
RD18 Sp1 ChIP on DKK1 promoter
n=1
	Name	data points	Average	stdev	p-value
IgG	technical replicate1	0.0508807	0.051124	0.00108611	0.0121258
	technical replicate2	0.0501802
	technical replicate3	0.0523111
SP1	technical replicate1	0.195232	0.189888	0.0268271
	technical replicate2	0.213641
	technical replicate3	0.160791
