# Supplementary material for: EHMT2 epigenetically suppresses Wnt signaling and is a potential target in embryonal rhabdomyosarcoma
Source: eLife. 2020 Nov 30;9:e57683. doi: 10.7554/eLife.57683 (PMC7728445; doi:10.7554/eLife.57683)
Supplement: Figure 4—source data 3. [file elife-57683-fig4-data3.xlsx]

## Sheet: Sheet1
Figure 4 - Source Data 2
Figure 4G, 4H, 4I: G9a regulates DKK1 expression through Sp1/p300 in a methyltranferase dependent manner.
Sp1, p300, and H3K9ac on DKK1 promoter with and without UNC0642 treatment
Raw Data Table
		RD18					RD18					RD18
Sp1 occupancy		DMSO	UNC0642		p300 occupancy		DMSO	UNC0642		H3K9ac		IgG	G9a
DKK1 promoter	Biological Replicate 1	3.99591	0.363121		DKK1 promoter	Biological Replicate 1	1.63413	0.115973		DKK1 promoter	Biological Replicate 1	2.70418	0.546587
		2.54651	0.23141				1.41277	0.35895				3.44664	0.716244
		2.71043	0.246306				1.17163	0.139841				2.55831	1.37413
	Biological Replicate 2	3.01437	1.01761			Biological Replicate 2	1.37096	0.525534			Biological Replicate 2	2.37598	0.358122
		2.95233	1.53176				1.25283	0.575089				2.29505	0.355648
		4.14639	1.47958				1.16086	0.470366				2.24781	0.414235
	Biological Replicate 3	3.40705	0.929927			Biological Replicate 3	1.40951	0.197765				3.95001	1.35209
		3.24568	1.56394				1.75953	0.349135				2.79308	0.568483
		3.17889	1.40951				0.843927	0.222497				5.10481	1.35209
Statistics Summary (GraphPad Prism 8)
Table Analyzed	Data 1				Table Analyzed	Data 1				Table Analyzed	Data 1
Column B	UNC0642				Column B	UNC0642				Column B	UNC0642
vs.	vs.				vs.	vs.				vs.	vs.
Column A	DMSO				Column A	DMSO				Column A	DMSO
Unpaired t test					Unpaired t test					Unpaired t test
P value	<0.0001				P value	<0.0001				P value	<0.0001
P value summary	****				P value summary	****				P value summary	****
Significantly different (P < 0.05)?	Yes				Significantly different (P < 0.05)?	Yes				Significantly different (P < 0.05)?	Yes
One- or two-tailed P value?	Two-tailed				One- or two-tailed P value?	Two-tailed				One- or two-tailed P value?	Two-tailed
t, df	t=9.447, df=16				t, df	t=9.447, df=16				t, df	t=6.464, df=16
How big is the difference?					How big is the difference?					How big is the difference?
Mean of column A	1.335				Mean of column A	1.335				Mean of column A	3.053
Mean of column B	0.3283				Mean of column B	0.3283				Mean of column B	0.782
Difference between means (B - A) ± SEM	-1.007 ± 0.1066				Difference between means (B - A) ± SEM	-1.007 ± 0.1066				Difference between means (B - A) ± SEM	-2.271 ± 0.3513
95% confidence interval	-1.233 to -0.7809				95% confidence interval	-1.233 to -0.7809				95% confidence interval	-3.016 to -1.526
R squared (eta squared)	0.848				R squared (eta squared)	0.848				R squared (eta squared)	0.7231
F test to compare variances					F test to compare variances					F test to compare variances
F, DFn, Dfd	2.552, 8, 8				F, DFn, Dfd	2.552, 8, 8				F, DFn, Dfd	4.545, 8, 8
P value	0.2067				P value	0.2067				P value	0.0466
P value summary	ns				P value summary	ns				P value summary	*
Significantly different (P < 0.05)?	No				Significantly different (P < 0.05)?	No				Significantly different (P < 0.05)?	Yes
Data analyzed					Data analyzed					Data analyzed
Sample size, column A	9				Sample size, column A	9				Sample size, column A	9
Sample size, column B	9				Sample size, column B	9				Sample size, column B	9
