# Supplementary material for: EHMT2 epigenetically suppresses Wnt signaling and is a potential target in embryonal rhabdomyosarcoma
Source: eLife. 2020 Nov 30;9:e57683. doi: 10.7554/eLife.57683 (PMC7728445; doi:10.7554/eLife.57683)
Supplement: Figure 4—source data 4. [file elife-57683-fig4-data4.xlsx]

## Sheet: Sheet1
Figure 4 - Source Data 3
Figure 4J: G9a regulates DKK1 expression through Sp1/p300 in a methyltranferase dependent manner.
Raw Data Table		RD18
		DMSO	UNC0642
Sp1-p300 PLA signal	Biological Replicate 1	22.8235	15.3529
		22.4054	14.46
		18.3714	12.5077
		18.0222	12.0169
	Biological Replicate 2	21.7895	6.37143
		23.8095	9.46429
		30.0385	6.40741
		25.6	7.89189
	Biological Replicate 3	23.0441	10.3857
		26.7683	19.7838
		25.8429	13.3026
		29.0933	10.1644
Statistics Summary (GraphPad Prism 8)
Table Analyzed	Data 1
Column B	UNC0642
vs.	vs.
Column A	DMSO
Unpaired t test
P value	<0.0001
P value summary	****
Significantly different (P < 0.05)?	Yes
One- or two-tailed P value?	Two-tailed
t, df	t=7.972, df=22
How big is the difference?
Mean of column A	23.97
Mean of column B	11.51
Difference between means (B - A) ± SEM	-12.46 ± 1.563
95% confidence interval	-15.70 to -9.217
R squared (eta squared)	0.7428
F test to compare variances
F, DFn, Dfd	1.104, 11, 11
P value	0.8721
P value summary	ns
Significantly different (P < 0.05)?	No
Data analyzed
Sample size, column A	12
Sample size, column B	12
