# Supplementary material for: EHMT2 epigenetically suppresses Wnt signaling and is a potential target in embryonal rhabdomyosarcoma
Source: eLife. 2020 Nov 30;9:e57683. doi: 10.7554/eLife.57683 (PMC7728445; doi:10.7554/eLife.57683)
Supplement: Figure 5—source data 1. [file elife-57683-fig5-data1.xlsx]

## Sheet: Sheet1
Figure 5 - Source Data 1
Figure 5A: DKK1 is a downstream effector of G9a function.
Raw Data Table
		HSMM	RD	RD18	JR1
DKK1 mRNA expression	Biological Replicate 1	0.00630189	0.0170983	0.0401998	0.0176197
		0.00604518	0.0170983	0.0391006	0.0172571
		0.00680118	0.0192366	0.0404794	0.0159902
	Biological Replicate 2	0.00388824	0.00702477	0.0351581	0.00946401
		0.00462392	0.00876924	0.040386	0.0110997
		0.00557556	0.00979775	0.0445016	0.0098659
	Biological Replicate 3	0.00326206	0.00561434	0.0282292	0.0185385
		0.00321715	0.00534844	0.0272676	0.0195955
		0.00340059	0.0054988	0.0261569	0.0208569
Statistics Summary (GraphPad Prism 8)
Table Analyzed	Data 1
Column B	RD
vs.	vs.
Column A	HSMM
Unpaired t test
P value	0.0084
P value summary	**
Significantly different (P < 0.05)?	Yes
One- or two-tailed P value?	Two-tailed
t, df	t=3.003, df=16
How big is the difference?
Mean of column A	0.004791
Mean of column B	0.01061
Difference between means (B - A) ± SEM	0.005819 ± 0.001938
95% confidence interval	0.001711 to 0.009927
R squared (eta squared)	0.3604
F test to compare variances
F, DFn, Dfd	15.79, 8, 8
P value	0.0008
P value summary	***
Significantly different (P < 0.05)?	Yes
Data analyzed
Sample size, column A	9
Sample size, column B	9
Table Analyzed	Data 1
Column C	RD18
vs.	vs.
Column A	HSMM
Unpaired t test
P value	<0.0001
P value summary	****
Significantly different (P < 0.05)?	Yes
One- or two-tailed P value?	Two-tailed
t, df	t=13.32, df=16
How big is the difference?
Mean of column A	0.004791
Mean of column C	0.03572
Difference between means (C - A) ± SEM	0.03093 ± 0.002323
95% confidence interval	0.02601 to 0.03585
R squared (eta squared)	0.9172
F test to compare variances
F, DFn, Dfd	23.12, 8, 8
P value	0.0002
P value summary	***
Significantly different (P < 0.05)?	Yes
Data analyzed
Sample size, column A	9
Sample size, column C	9
Table Analyzed	Data 1
Column D	JR1
vs.	vs.
Column A	HSMM
Unpaired t test
P value	<0.0001
P value summary	****
Significantly different (P < 0.05)?	Yes
One- or two-tailed P value?	Two-tailed
t, df	t=7.109, df=16
How big is the difference?
Mean of column A	0.004791
Mean of column D	0.01559
Difference between means (D - A) ± SEM	0.01080 ± 0.001519
95% confidence interval	0.007577 to 0.01402
R squared (eta squared)	0.7595
F test to compare variances
F, DFn, Dfd	9.315, 8, 8
P value	0.0049
P value summary	**
Significantly different (P < 0.05)?	Yes
Data analyzed
Sample size, column A	9
Sample size, column D	9
