# Supplementary material for: EHMT2 epigenetically suppresses Wnt signaling and is a potential target in embryonal rhabdomyosarcoma
Source: eLife. 2020 Nov 30;9:e57683. doi: 10.7554/eLife.57683 (PMC7728445; doi:10.7554/eLife.57683)
Supplement: Figure 5—source data 2. [file elife-57683-fig5-data2.xlsx]

## Sheet: Sheet1
Figure 5 - Source Data 2
Figure 5D: DKK1 is a downstream effector of G9a function.
Raw Data Table		RD18
		siRNA	siDKK1
BrdU positive percentage	Biological Replicate 1	61.3636	40
		65.8537	44.1176
		58.4906	39.0244
		64.1026	40.9836
	Biological Replicate 2	53.3597	27.5109
		50.9333	29.3478
		48.0874	31.2821
		48.0874	39.6104
	Biological Replicate 3	56.2791	34.2246
		50.4673	36.1905
		53.3333	35.3659
		49.2611	34.632
Statistics Summary (GraphPad Prism 8)
Table Analyzed	Data 1
Column B	siDKK1
vs.	vs.
Column A	siRNA
Unpaired t test
P value	<0.0001
P value summary	****
Significantly different (P < 0.05)?	Yes
One- or two-tailed P value?	Two-tailed
t, df	t=8.233, df=22
How big is the difference?
Mean of column A	54.97
Mean of column B	36.02
Difference between means (B - A) ± SEM	-18.94 ± 2.301
95% confidence interval	-23.72 to -14.17
R squared (eta squared)	0.7549
F test to compare variances
F, DFn, Dfd	1.561, 11, 11
P value	0.4722
P value summary	ns
Significantly different (P < 0.05)?	No
Data analyzed
Sample size, column A	12
Sample size, column B	12
