# Supplementary material for: EHMT2 epigenetically suppresses Wnt signaling and is a potential target in embryonal rhabdomyosarcoma
Source: eLife. 2020 Nov 30;9:e57683. doi: 10.7554/eLife.57683 (PMC7728445; doi:10.7554/eLife.57683)
Supplement: Figure 5—source data 3. [file elife-57683-fig5-data3.xlsx]

## Sheet: Sheet1
Figure 5 - Source Data 3
Figure 5E: DKK1 is a downstream effector of G9a function.
Raw Data Table		RD18
		siRNA	siDKK1
Myogenin mRNA expression	Biological Replicate 1	0.00667662	0.0122026
		0.0065847	0.0129881
		0.0061013	0.0137286
	Biological Replicate 2	0.00578554	0.0112547
		0.00742531	0.00979775
		0.00779447	0.00959612
	Biological Replicate 3	0.00581233	0.0114911
		0.00593446	0.0102138
		0.0061013	0.00946401
Statistics Summary (GraphPad Prism 8)
Table Analyzed	Data 1
Column B	siDKK1
vs.	vs.
Column A	siRNA
Unpaired t test
P value	<0.0001
P value summary	****
Significantly different (P < 0.05)?	Yes
One- or two-tailed P value?	Two-tailed
t, df	t=8.289, df=16
How big is the difference?
Mean of column A	0.006468
Mean of column B	0.01119
Difference between means (B - A) ± SEM	0.004725 ± 0.0005700
95% confidence interval	0.003516 to 0.005933
R squared (eta squared)	0.8111
F test to compare variances
F, DFn, Dfd	4.593, 8, 8
P value	0.0452
P value summary	*
Significantly different (P < 0.05)?	Yes
Data analyzed
Sample size, column A	9
Sample size, column B	9
