# Supplementary material for: EHMT2 epigenetically suppresses Wnt signaling and is a potential target in embryonal rhabdomyosarcoma
Source: eLife. 2020 Nov 30;9:e57683. doi: 10.7554/eLife.57683 (PMC7728445; doi:10.7554/eLife.57683)
Supplement: Figure 5—source data 4. [file elife-57683-fig5-data4.xlsx]

## Sheet: Sheet1
Figure 5 - Source Data 4
Figure 5F: DKK1 is a downstream effector of G9a function.
Raw Data Table		RD18
		siRNA	siG9a	siRNA+rDKK1
Myogenin mRNA expression	Biological Replicate 1	0.137103	0.191666	0.144252
		0.127922	0.23761	0.122995
		0.139017	0.229516	0.140308
	Biological Replicate 2	0.130007	0.177595	0.135842
		0.122145	0.189027	0.137738
		0.128218	0.181327	0.14161
	Biological Replicate 3	0.0824692	0.155681	0.115824
		0.0890031	0.152477	0.115824
		0.0934281	0.153538	0.108819
Statistics Summary (GraphPad Prism 8)
Table Analyzed	Data 1
Column B	siG9a
vs.	vs.
Column A	siRNA
Unpaired t test
P value	<0.0001
P value summary	****
Significantly different (P < 0.05)?	Yes
One- or two-tailed P value?	Two-tailed
t, df	t=5.409, df=16
How big is the difference?
Mean of column A	0.1166
Mean of column B	0.1854
Difference between means (B - A) ± SEM	0.06879 ± 0.01272
95% confidence interval	0.04183 to 0.09575
R squared (eta squared)	0.6465
F test to compare variances
F, DFn, Dfd	2.017, 8, 8
P value	0.341
P value summary	ns
Significantly different (P < 0.05)?	No
Data analyzed
Sample size, column A	9
Sample size, column B	9
Table Analyzed	Data 1
Column C	siRNA+rDKK1
vs.	vs.
Column B	siG9a
Unpaired t test
P value	0.0001
P value summary	***
Significantly different (P < 0.05)?	Yes
One- or two-tailed P value?	Two-tailed
t, df	t=4.962, df=16
How big is the difference?
Mean of column B	0.1854
Mean of column C	0.1292
Difference between means (C - B) ± SEM	-0.05614 ± 0.01131
95% confidence interval	-0.08012 to -0.03215
R squared (eta squared)	0.6061
F test to compare variances
F, DFn, Dfd	5.433, 8, 8
P value	0.0275
P value summary	*
Significantly different (P < 0.05)?	Yes
Data analyzed
Sample size, column B	9
Sample size, column C	9
