# Supplementary material for: EHMT2 epigenetically suppresses Wnt signaling and is a potential target in embryonal rhabdomyosarcoma
Source: eLife. 2020 Nov 30;9:e57683. doi: 10.7554/eLife.57683 (PMC7728445; doi:10.7554/eLife.57683)
Supplement: Figure 5—source data 5. [file elife-57683-fig5-data5.xlsx]

## Sheet: Sheet1
Figure 5 - Source Data 5
Figure 5F: DKK1 is a downstream effector of G9a function.
Raw Data Table		RD18
		siRNA	siG9a	siG9a+rDKK1
BrdU positive percentage	Biological Replicate 1	47.4453	38.1679	60.5556
		47.8632	33.9286	48.6207
		50.3571	38.5965	48.6207
		56.6964	33.0033	50.6849
	Biological Replicate 2	48.1928	0.342105	52.3077
		47.7273	32.1716	46.4539
		53.3865	36.3309	60
		48.9286	32.4	47.8125
	Biological Replicate 3	50	35.3698	52.1898
		45.2442	29.0984	47.9167
		46.5854	37.2414	41.5144
		51.8106	36.6925	55.6818
Statistics Summary (GraphPad Prism 8)
Table Analyzed	Data 1
Column B	siG9a
vs.	vs.
Column A	siRNA
Unpaired t test
P value	<0.0001
P value summary	****
Significantly different (P < 0.05)?	Yes
One- or two-tailed P value?	Two-tailed
t, df	t=5.625, df=22
How big is the difference?
Mean of column A	49.52
Mean of column B	31.95
Difference between means (B - A) ± SEM	-17.57 ± 3.124
95% confidence interval	-24.05 to -11.09
R squared (eta squared)	0.5899
F test to compare variances
F, DFn, Dfd	10.52, 11, 11
P value	0.0005
P value summary	***
Significantly different (P < 0.05)?	Yes
Data analyzed
Sample size, column A	12
Sample size, column B	12
Table Analyzed	Data 1
Column C	siG9a+rDKK1
vs.	vs.
Column B	siG9a
Unpaired t test
P value	<0.0001
P value summary	****
Significantly different (P < 0.05)?	Yes
One- or two-tailed P value?	Two-tailed
t, df	t=5.632, df=22
How big is the difference?
Mean of column B	31.95
Mean of column C	51.03
Difference between means (C - B) ± SEM	19.08 ± 3.389
95% confidence interval	12.06 to 26.11
R squared (eta squared)	0.5905
F test to compare variances
F, DFn, Dfd	3.470, 11, 11
P value	0.0502
P value summary	ns
Significantly different (P < 0.05)?	No
Data analyzed
Sample size, column B	12
Sample size, column C	12
