# Supplementary material for: EHMT2 epigenetically suppresses Wnt signaling and is a potential target in embryonal rhabdomyosarcoma
Source: eLife. 2020 Nov 30;9:e57683. doi: 10.7554/eLife.57683 (PMC7728445; doi:10.7554/eLife.57683)
Supplement: Figure 5—source data 6. [file elife-57683-fig5-data6.xlsx]

## Sheet: Sheet1
Figure 5 - Source Data 6
Figure 5G: DKK1 is a downstream effector of G9a function.
Raw Data Table		RD18
		siRNA	siG9a	siG9a+LGK974
Myogenin mRNA expression	Biological Replicate 1	0.0552966	0.0906636	0.0789272
		0.0580457	0.0912942	0.073133
		0.0622119	0.0912942	0.0632262
	Biological Replicate 2	0.0807721	0.128514	0.0927827
		0.0824692	0.128514	0.0940779
		0.0813339	0.125869	0.0927827
	Biological Replicate 3	0.0534129	0.0938608	0.05581
		0.0556812	0.0925686	0.0654559
		0.0584495	0.0912942	0.0632262
Statistics Summary (GraphPad Prism 8)
Table Analyzed	Data 1
Column C	siG9a+LGK974
vs.	vs.
Column B	siG9a
Unpaired t test
P value	0.0022
P value summary	**
Significantly different (P < 0.05)?	Yes
One- or two-tailed P value?	Two-tailed
t, df	t=3.648, df=16
How big is the difference?
Mean of column B	0.1038
Mean of column C	0.07549
Difference between means (C - B) ± SEM	-0.02827 ± 0.007751
95% confidence interval	-0.04470 to -0.01184
R squared (eta squared)	0.454
F test to compare variances
F, DFn, Dfd	1.472, 8, 8
P value	0.5973
P value summary	ns
Significantly different (P < 0.05)?	No
Data analyzed
Sample size, column B	9
Sample size, column C	9
Table Analyzed	Data 1
Column B	siG9a
vs.	vs.
Column A	siRNA
Unpaired t test
P value	<0.0001
P value summary	****
Significantly different (P < 0.05)?	Yes
One- or two-tailed P value?	Two-tailed
t, df	t=5.288, df=16
How big is the difference?
Mean of column A	0.0653
Mean of column B	0.1038
Difference between means (B - A) ± SEM	0.03847 ± 0.007274
95% confidence interval	0.02305 to 0.05389
R squared (eta squared)	0.6361
F test to compare variances
F, DFn, Dfd	2.087, 8, 8
P value	0.3185
P value summary	ns
Significantly different (P < 0.05)?	No
Data analyzed
Sample size, column A	9
Sample size, column B	9
