# Supplementary material for: EHMT2 epigenetically suppresses Wnt signaling and is a potential target in embryonal rhabdomyosarcoma
Source: eLife. 2020 Nov 30;9:e57683. doi: 10.7554/eLife.57683 (PMC7728445; doi:10.7554/eLife.57683)
Supplement: Figure 5—source data 7. [file elife-57683-fig5-data7.xlsx]

## Sheet: Sheet1
Figure 5 - Source Data 7
Figure 5G: DKK1 is a downstream effector of G9a function.
Raw Data Table		RD18
		siRNA	siG9a	siG9a+LGK974
Myogenin mRNA expression	Biological Replicate 1	45.1724	31.7308	48
		45.4259	32.7217	46.1268
		45.1852	36.413	46.6926
	Biological Replicate 2	44.2697	31.5603	44.6875
		51.2727	32.3288	54.2056
		45.0677	37.037	51.1111
	Biological Replicate 3	56.1404	38.2353	52.381
		44.5652	36.3636	54.7619
		51.1682	38.7195	44.2675
		53.7538	35.3125	48.1081
		49.3023	28.75	49.0625
		48.4211	33.4211	45.4118
Statistics Summary (GraphPad Prism 8)
Table Analyzed	Data 1
Column B	siG9a
vs.	vs.
Column A	siRNA
Unpaired t test
P value	<0.0001
P value summary	****
Significantly different (P < 0.05)?	Yes
One- or two-tailed P value?	Two-tailed
t, df	t=9.531, df=22
How big is the difference?
Mean of column A	48.31
Mean of column B	34.38
Difference between means (B - A) ± SEM	-13.93 ± 1.461
95% confidence interval	-16.96 to -10.90
R squared (eta squared)	0.805
F test to compare variances
F, DFn, Dfd	1.705, 11, 11
P value	0.39
P value summary	ns
Significantly different (P < 0.05)?	No
Data analyzed
Sample size, column A	12
Sample size, column B	12
Table Analyzed	Data 1
Column C	siG9a+LGK974
vs.	vs.
Column B	siG9a
Unpaired t test
P value	<0.0001
P value summary	****
Significantly different (P < 0.05)?	Yes
One- or two-tailed P value?	Two-tailed
t, df	t=10.45, df=22
How big is the difference?
Mean of column B	34.38
Mean of column C	48.73
Difference between means (C - B) ± SEM	14.35 ± 1.373
95% confidence interval	11.50 to 17.20
R squared (eta squared)	0.8324
F test to compare variances
F, DFn, Dfd	1.387, 11, 11
P value	0.5966
P value summary	ns
Significantly different (P < 0.05)?	No
Data analyzed
Sample size, column B	12
Sample size, column C	12
