# Supplementary material for: EHMT2 epigenetically suppresses Wnt signaling and is a potential target in embryonal rhabdomyosarcoma
Source: eLife. 2020 Nov 30;9:e57683. doi: 10.7554/eLife.57683 (PMC7728445; doi:10.7554/eLife.57683)
Supplement: Figure 6—source data 1. [file elife-57683-fig6-data1.xlsx]

## Sheet: Sheet1
Figure 6 - Source Data 1
Figure 6A: G9a regulates tumor growth by regulation of DKK1 and Wnt signaling.
Raw Data Table		Relative Tumor Volume													Body weight (grams)
	Days	DMSO					UNC0642							Days	DMSO					UNC0642
	0	1	1	1	1	1	1	1	1	1	1			0	18.9	20.1	20.6	18.8	20.4	20.2	18.5	19.6	20.2	20.7
	4	1.20146	1.17448	1.11051	1.21936	1.16492	1.20215	1.1624	1.11454	1.17126	1.16487			4	19.4	19.6	20.1	19.3	21	20.8	19.1	19.1	19.8	21.3
	8	1.41575	1.33187	1.271	1.46432	1.59209	1.36307	1.42846	1.23989	1.36577	1.32554			8	18.3	19.1	20.8	18.9	19.7	20.4	18	18.3	20.1	19.5
	12	1.6697	1.61477	1.52311	1.71984	1.78112	1.58981	1.64307	1.38341	1.57024	1.46542			12	18.6	19.7	19.9	19.3	20.3	20.8	19	19.3	20.8	20.1
	16	2.02827	2.00464	1.75925	2.03451	2.29124	1.91784	1.91325	1.59071	1.72703	1.63276			16	20	20	20.2	18.5	20	20	20.8	20.6	19.4	20.5
	20	2.37911	2.46832	2.1115	2.39763	2.73349	2.08648	2.18275	1.80968	2.00889	1.90239			20	20.1	20.3	20.1	19.4	20.7	19.9	19.2	19.4	20.2	21.5
	24	3.04308	3.19771	2.5229	2.90677	3.12561	2.52367	2.58705	2.20265	2.45606	2.32231			24	19.3	19.5	19.8	19.1	20.1	20.5	20.6	20.3	20.8	20.4
	28	3.83122	3.93406	3.20062	3.80219	4.44594	2.66278	3.16216	2.64099	2.98099	2.57789			28	19.8	19.8	20.3	18.5	20.1	20.1	21	20	19.8	21.6
	32	4.70518	4.92866	3.6671	5.85874	7.8072	3.11749	3.62999	3.26663	4.17425	2.84411			32	19.1	19.9	20.4	19	20.7	19.7	20.3	19.3	20.3	21.1
Statistics Summary (GraphPad Prism 8)
Table Analyzed	Data 4													Table Analyzed	Data 5
Two-way RM ANOVA	Matching: Across row													Two-way RM ANOVA	Matching: Across row
Assume sphericity?	Yes													Assume sphericity?	Yes
Alpha	0.05													Alpha	0.05
Source of Variation	% of total variation	P value	P value summary	Significant?										Source of Variation	% of total variation	P value	P value summary	Significant?
Interaction	6.657	0.0002	***	Yes										Interaction	5.445	0.764	ns	No
Row Factor	78.79	<0.0001	****	Yes										Row Factor	9.423	0.4078	ns	No
Time	4.375	<0.0001	****	Yes										Time	5.141	0.0388	*	Yes
Subject	4.71	0.672	ns	No										Subject	39.77	0.5132	ns	No
ANOVA table	SS	DF	MS	F (DFn, DFd)	P value									ANOVA table	SS	DF	MS	F (DFn, DFd)	P value
Interaction	8.429	8	1.054	F (8, 36) = 5.476	P=0.0002									Interaction	2.791	8	0.3489	F (8, 36) = 0.6092	P=0.7640
Row Factor	99.77	8	12.47	F (8, 36) = 75.27	P<0.0001									Row Factor	4.83	8	0.6038	F (8, 36) = 1.066	P=0.4078
Time	5.54	1	5.54	F (1, 36) = 28.79	P<0.0001									Time	2.635	1	2.635	F (1, 36) = 4.602	P=0.0388
Subject	5.964	36	0.1657	F (36, 36) = 0.8610	P=0.6720									Subject	20.39	36	0.5663	F (36, 36) = 0.9889	P=0.5132
Residual	6.927	36	0.1924											Residual	20.61	36	0.5726
Difference between column means														Difference between column means
Mean of DMSO	2.432													Mean of DMSO	19.72
Mean of UNC0642	1.936													Mean of UNC0642	20.06
Difference between means	0.4962													Difference between means	-0.3422
SE of difference	0.09248													SE of difference	0.1595
95% CI of difference	0.3086 to 0.6837													95% CI of difference	-0.6658 to -0.01868
Data summary														Data summary
Number of columns (Time)	2													Number of columns (Time)	2
Number of rows (Row Factor)	9													Number of rows (Row Factor)	9
Number of subjects (Subject)	45													Number of subjects (Subject)	45
