# Supplementary material for: EHMT2 epigenetically suppresses Wnt signaling and is a potential target in embryonal rhabdomyosarcoma
Source: eLife. 2020 Nov 30;9:e57683. doi: 10.7554/eLife.57683 (PMC7728445; doi:10.7554/eLife.57683)
Supplement: Figure 6—source data 2. [file elife-57683-fig6-data2.xlsx]

## Sheet: Sheet1
Figure 6 - Source Data 1
Figure 6C: G9a regulates tumor growth by regulation of DKK1 and Wnt signaling.
Raw data table		Relative Tumor Volume																				Body weight (grams)
	Days	shscm						shG9a						shG9a+LGk974							Days	shscm						shG9a						shG9a+LGk974
	0	1	1	1	1	1	1	1	1	1	1	1	1	1	1	1	1	1	1		0	17.9	19.5	20.1	18.9	19.5	18.6	20.4	20.2	19.8	19.5	18.9	19.4	21.3	18.9	19.7	19.1	20.5	19.7
	4	1.14166	1.35832	1.19476	1.16929	1.22996	1.36711	1.20523	1.2844	1.44901	1.11008	1.08301	1.18173	1.51308	1.5324	1.60924	1.28068	1.40001	1.38937		4	18.6	20	20.6	18.8	19.4	19.3	20	20.6	20	20.1	19.4	20.1	19.6	19.5	19.1	19	20	19.5
	8	1.3563	1.83328	1.58151	2.21308	1.83207	1.80452	1.51134	1.6308	1.80468	1.32668	1.28062	1.38624	2.01413	2.43257	2.32962	1.77029	1.97531	2.01384		8	18.5	19.1	20	19.1	19.2	18	19.5	21.1	19.6	19.7	19	19.6	20.5	19.9	20	19.2	20.8	20.1
	12	2.75771	3.04686	2.86429	2.66216	2.82417	2.68466	1.94963	2.19205	2.34291	1.61196	1.57839	1.63658	2.95464	3.64757	3.11133	4.23694	2.78189	2.87525		12	18.9	19.7	19.3	19.2	19.5	19.3	20.5	20.3	19.7	20.4	19.3	19.2	20.8	19	19.3	19.3	19.8	19.2
	16	3.577	3.91365	4.17132	3.86281	3.56326	2.32707	2.32877	2.63678	3.25865	2.12499	1.8256	2.17421	3.60563	4.08317	3.49931	5.52563	3.17036	3.48002		16	18.7	20.1	20.3	18.7	19.7	19.5	20.8	20.6	19.4	20.1	19.4	19.9	19.9	18.8	19.8	18.9	20.1	19.6
	20	5.51029	5.88706	6.79059	6.01521	5.61763	3.65021	3.62335	3.98449	5.02733	3.20965	2.78832	3.61642	5.28951	6.99798	6.15348	8.07952	5.36494	6.56298		20	18.3	20.3	20	19	18.7	18.9	20.3	21.3	19.5	19.8	19.7	20	20.8	19.6	20.2	18.8	20.8	20.2
	24	10.8646	13.9755	13.399	12.4204	11.6371	11.2081	7.4609	7.35633	9.80992	6.09208	5.23661	9.92169	12.7716	18.0092	15.0087	17.1101	11.1894	13.3302		24	18.8	19.5	19.5	19.3	19.4	18.5	19.7	20.5	19.2	19.4	18.9	19.1	20.2	18.9	19.5	19.2	20.1	19.9
	28	15.9012	19.532	19.3286	16.497	16.5194	16.3738	11.5667	14.7828	13.9401	10.0935	9.26248	12.1856	17.0714	21.9477	17.974	19.8992	14.3969	17.6593		28	18.5	20.2	20.5	19.2	20.2	19.1	20.7	20.2	19.4	20.1	18.8	19.6	21.4	19.7	19.9	19.1	19.8	19.5
	32	24.7195	26.6587	27.5141	22.3609	22.2741	22.7677	17.5875	17.1394	17.8701	12.7194	11.2919	17.7993	27.6993	31.1902	24.9437	24.7973	22.7697	25.8896		32	18.1	19.1	20.2	19	19	18.4	20.4	21.1	19.6	20.3	19.2	19.7	19.9	20	19.2	19	20.6	20
Statistics Summary (GraphPad Prism 8)
Table Analyzed	Data 2																				Table Analyzed	Data 3
Two-way RM ANOVA	Matching: Across row																				Two-way RM ANOVA	Matching: Across row
Assume sphericity?	Yes																				Assume sphericity?	Yes
Alpha	0.05																				Alpha	0.05
Source of Variation	% of total variation	P value	P value summary	Significant?																	Source of Variation	% of total variation	P value	P value summary	Significant?
Interaction	0.1996	0.0885	ns	No																	Interaction	7.363	0.603	ns	No
Row Factor	97.19	<0.0001	****	Yes																	Row Factor	2.722	0.7588	ns	No
Time	0.2264	0.0002	***	Yes																	Time	13.55	0.0013	**	Yes
Subject	1.783	0.0002	***	Yes																	Subject	24.81	0.9921	ns	No
ANOVA table	SS	DF	MS	F (DFn, DFd)	P value																ANOVA table	SS	DF	MS	F (DFn, DFd)	P value
Interaction	14.8	8	1.85	F (8, 45) = 1.871	P=0.0885																Interaction	3.805	8	0.4756	F (8, 45) = 0.8032	P=0.6030
Row Factor	7205	8	900.7	F (8, 45) = 306.7	P<0.0001																Row Factor	1.407	8	0.1758	F (8, 45) = 0.6172	P=0.7588
Time	16.79	1	16.79	F (1, 45) = 16.98	P=0.0002																Time	7.002	1	7.002	F (1, 45) = 11.82	P=0.0013
Subject	132.2	45	2.937	F (45, 45) = 2.972	P=0.0002																Subject	12.82	45	0.2849	F (45, 45) = 0.4811	P=0.9921
Residual	44.47	45	0.9883																		Residual	26.65	45	0.5922
Difference between column means																					Difference between column means
Mean of shscm	7.773																				Mean of shscm	19.25
Mean of shG9a+LGk974	8.562																				Mean of shG9a+LGk974	19.76
Difference between means	-0.7885																				Difference between means	-0.5093
SE of difference	0.1913																				SE of difference	0.1481
95% CI of difference	-1.174 to -0.4031																				95% CI of difference	-0.8075 to -0.2110
Data summary																					Data summary
Number of columns (Time)	2																				Number of columns (Time)	2
Number of rows (Row Factor)	9																				Number of rows (Row Factor)	9
Number of subjects (Subject)	54																				Number of subjects (Subject)	54
