# Supplementary material for: EHMT2 epigenetically suppresses Wnt signaling and is a potential target in embryonal rhabdomyosarcoma
Source: eLife journal article supplement (doi:10.7554/elife.57683), 2020-11-30
Supplement: supp [file elife-57683-supp-v1.zip]

Figure 1C

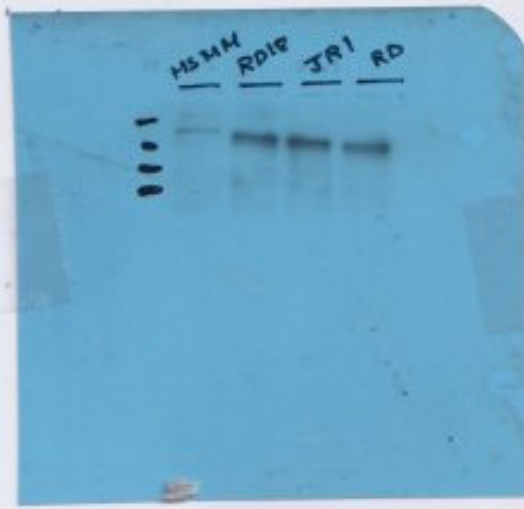

Primary Ab: 699  
dilution: 1:300  
Secondary Ab: Rabbit  
dilution: 1:5000

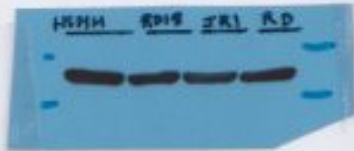

Primary Ab:  $\beta$ -actin  
dilution: 1:10000  
Secondary Ab:  
dilution: 1:5000

Figure 2A

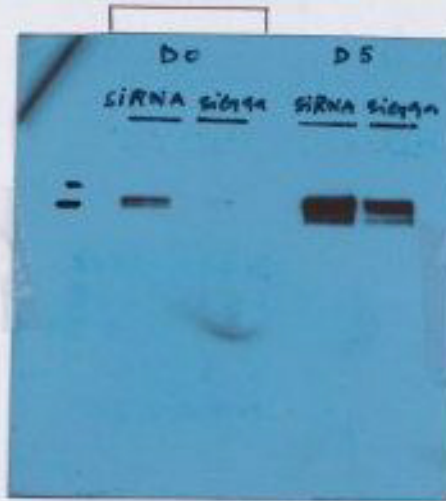

Primary Ab : Grp94  
Dilution : 1 : 300  
Secondary Ab : Rabbit  
Dilution : 1 : 5000

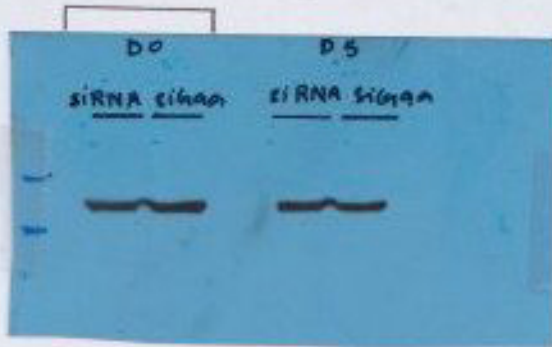

Primary Ab :  $\beta$ -actin  
Dilution : 1 : 10000  
Secondary Ab : Mouse  
Dilution : 1 : 5000

Figure 2B

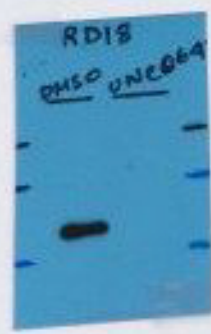

Primary Ab: H3K9me2  
Dilution: 1:1000  
Secondary Ab: Rabbit  
Dilution: 1:5000

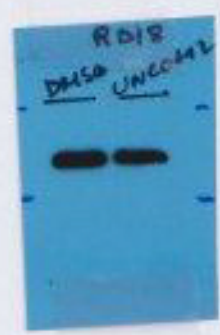

Primary Ab: H3  
Dilution: 1:10000  
Secondary Ab: Rabbit  
Dilution: 1:5000

Figure 2C (siRNA, siG9a)

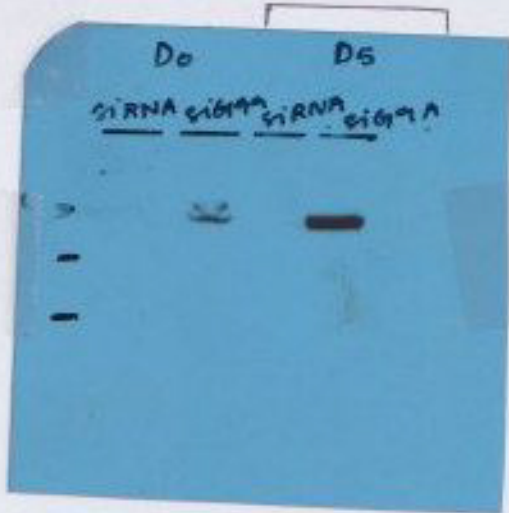

Primary Ab: MHC  
Dilution: 1:300  
Secondary Ab: Mouse  
Dilution: 1:5000

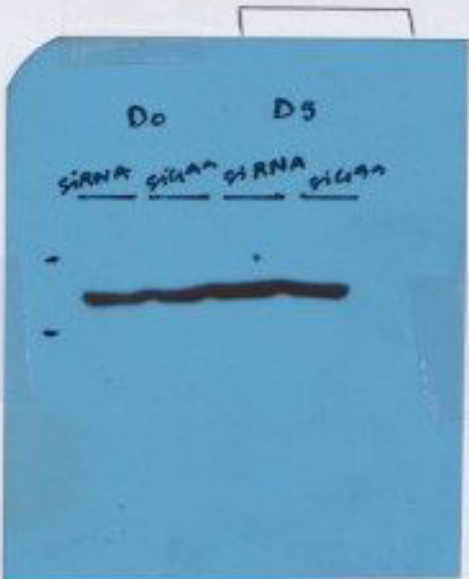

Primary Ab:  $\beta$ -actin  
Dilution: 1:10000  
Secondary Ab: Mouse  
Dilution: 1:5000

Figure 2C (DMSO, UNC0642)

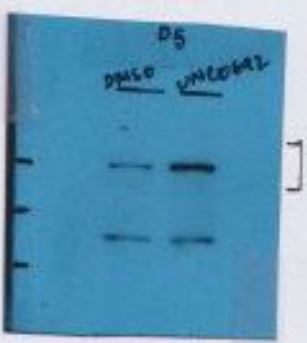

Primary Ab : MHC  
Dilution : 1 : 300  
Secondary Ab : Mouse  
Dilution : 1 : 5000

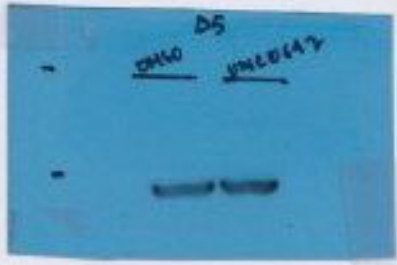

Primary Ab :  $\beta$ -actin  
Dilution : 1 : 10000  
Secondary Ab : Mouse  
Dilution : 1 : 5000

Figure 3F, G

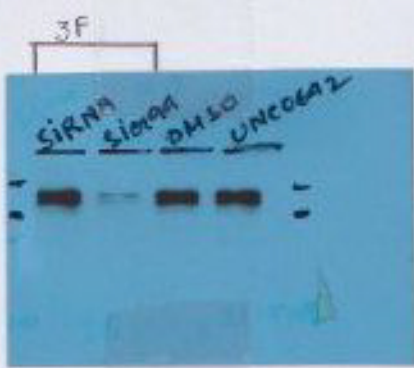

Primary Ab : 619A  
Dilution : 1 : 800  
Secondary Ab : Rabbit  
Dilution : 1 : 5000

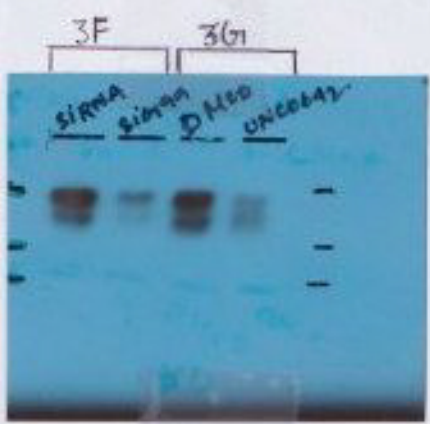

Primary Ab : DKK1  
Dilution : 1 : 800  
Secondary Ab : Mouse  
Dilution : 1 : 5000

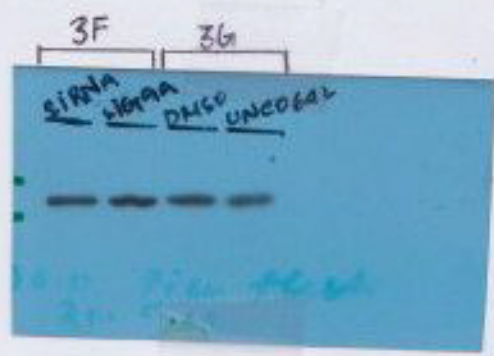

Primary Ab :  $\beta$ -actin  
Dilution : 1 : 10 000  
Secondary Ab : Mouse  
Dilution : 1 : 5000

Figure 3H

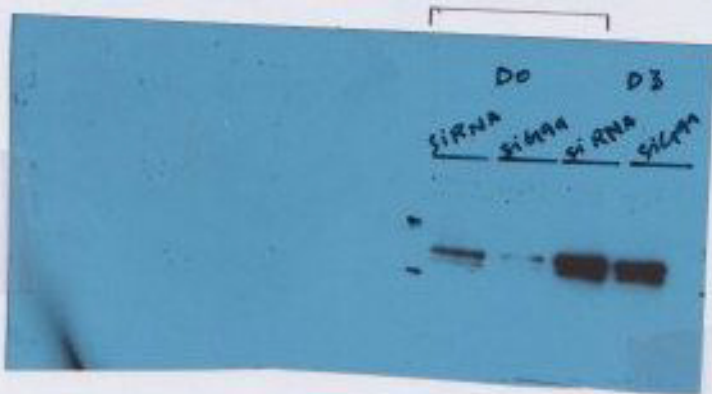

Primary Ab: G9a  
Dilution: 1:300  
Secondary Ab: Rabbit  
Dilution: 1:5000

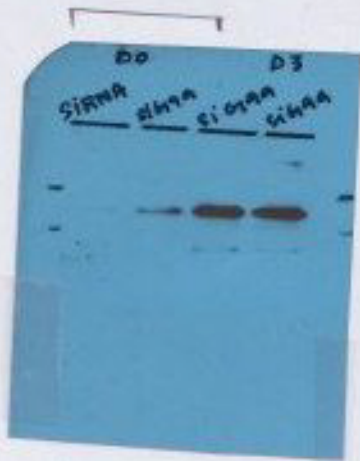

Primary Ab: Aβ-catenin  
Dilution: 1:500  
Secondary Ab: Mouse  
Dilution: 1:5000

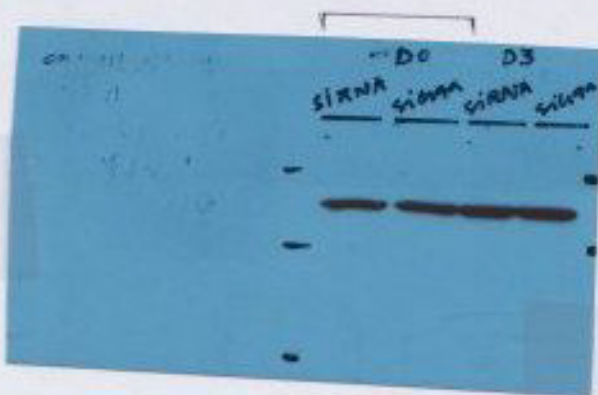

Primary Ab: β-actin  
Dilution: 1:10000  
Secondary Ab: Mouse  
Dilution: 1:5000

Figure 3I

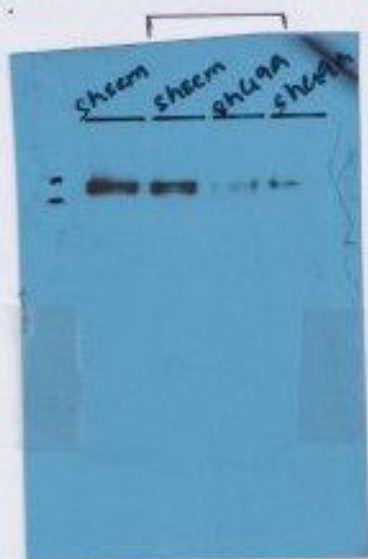

Primary Ab: 6199  
Dilution: 1:300

Secondary Ab: Rabbit  
Dilution: 1:5000

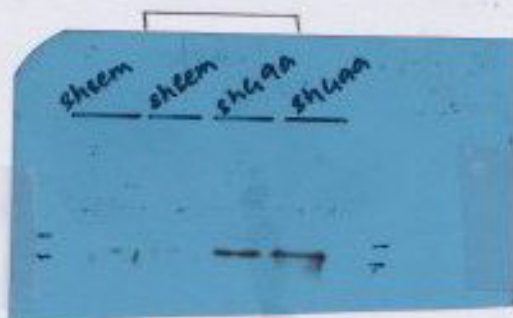

Primary Ab: A- $\beta$ -catenin  
Dilution: 1:500

Secondary Ab: Mouse  
Dilution: 1:5000

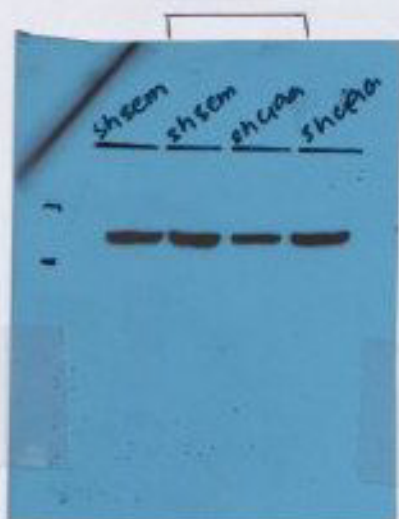

Primary Ab:  $\beta$ -actin  
Dilution: 1:10000

Secondary Ab: Mouse  
Dilution: 1:5000



Figure 3J

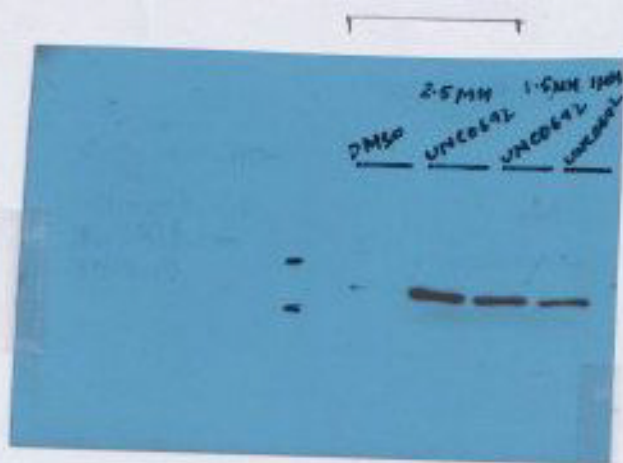

Primary Ab: A-β-catenin  
Dilution: 1:500  
Secondary Ab: Mouse  
Dilution: 1:5000

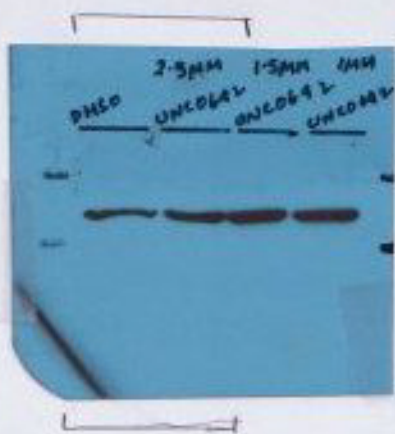

Primary Ab: β-actin  
Dilution: 1:10000  
Secondary Ab: Mouse  
Dilution: 1:5000

Figure 4F

RD input

IgG DMSO UNC0642

P300 primary ab  
1:200  
Rabbit secondary  
1:5000  
Pico

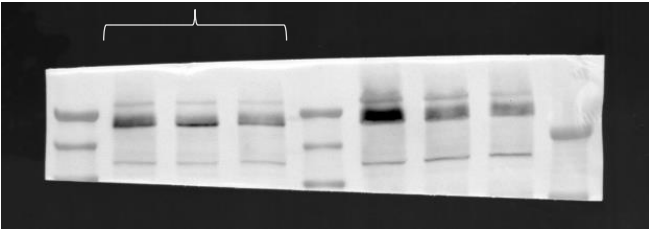

G9a primary ab  
1:300  
Rabbit secondary  
1:5000  
Pico

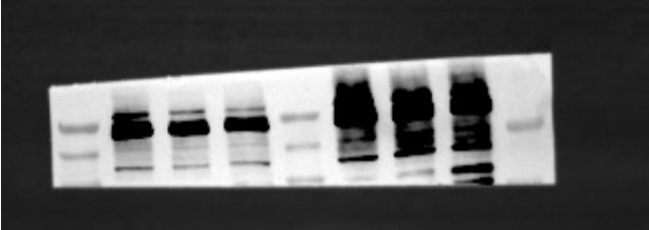

Sp1 primary ab  
1:50  
Mouse secondary  
1:5000  
Pico

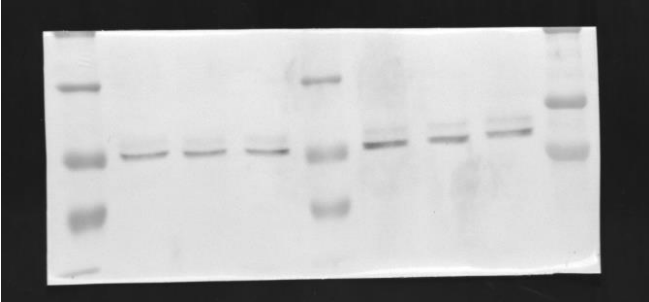

RD Sp1 pulldown

IgG DMSO UNC0642

P300 primary ab  
1:200  
Rabbit secondary  
1:5000  
Pico

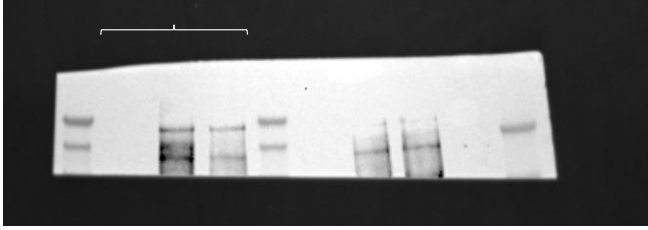

Sp1 primary ab  
1:50  
Mouse secondary  
1:5000  
Pico

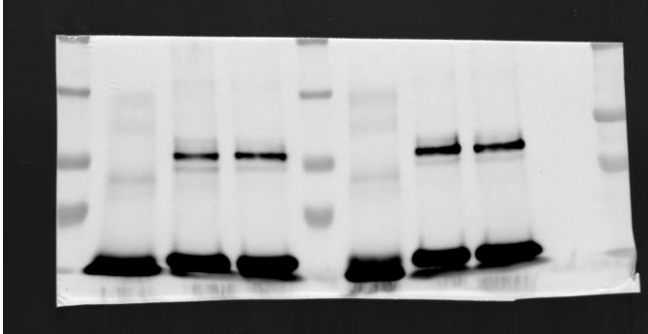

Figure 5B

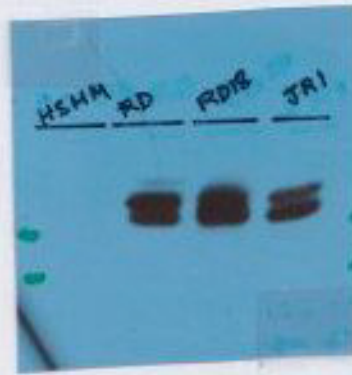

Primary Ab: DUK1  
Dilution: 1:500  
Secondary Ab: Mouse  
Dilution: 1:5000

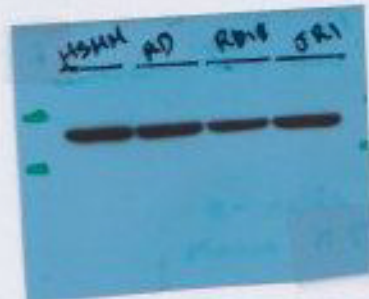

Primary Ab:  $\beta$ -actin  
Dilution: 1:10000  
Secondary Ab: Mouse  
Dilution: 1:5000

Figure 5C

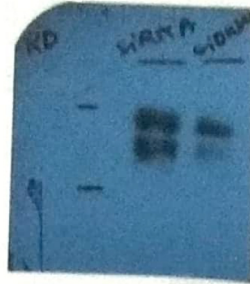

Primary Ab : DKK1  
Dilution : 1 : 300  
Secondary Ab : Mouse  
Dilution : 1 : 5000

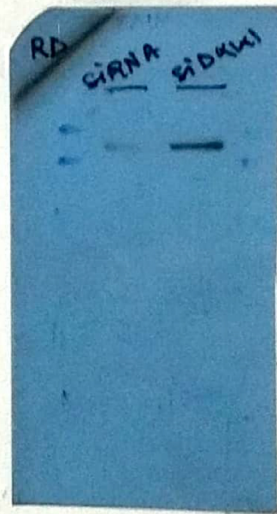

Primary Ab : A-β-catenin  
Dilution : 1 : 500  
Secondary Ab : Mouse  
Dilution : 1 : 5000

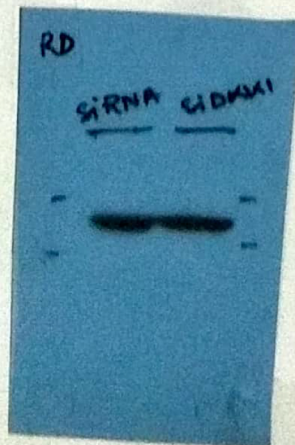

Primary Ab : β-actin  
Dilution : 1 : 10000  
Secondary Ab : Mouse  
Dilution : 1 : 5000

Figure 5D

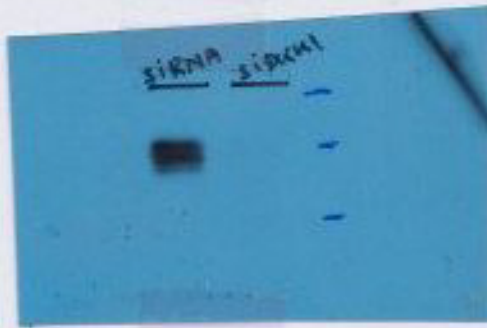

Primary Ab: DHX1  
Dilution: 1:300  
Secondary Ab: Mouse  
Dilution: 1:5000

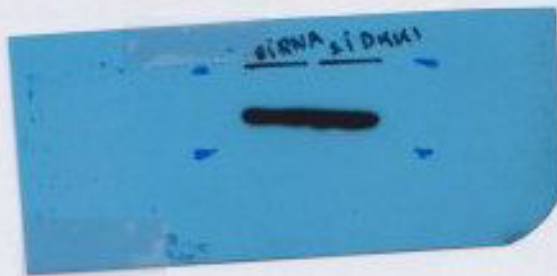

Primary Ab:  $\beta$ -actin  
Dilution: 1:10000  
Secondary Ab: Mouse  
Dilution: 1:5000

Figure 5E

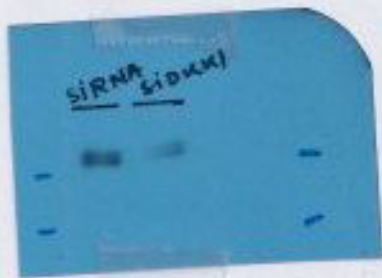

Primary Ab : DKK1  
Dilution : 1 : 300  
Secondary Ab : Mouse  
Dilution : 1 : 5000

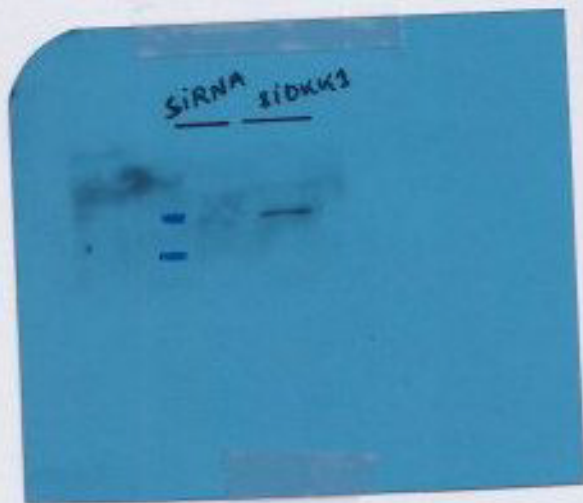

Primary Ab : MHC  
Dilution : 1 : 300  
Secondary Ab : Mouse  
Dilution : 1 : 5000

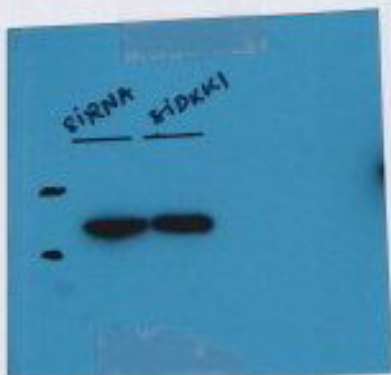

Primary Ab :  $\beta$ -actin  
Dilution : 1 : 10000  
Secondary Ab : Mouse  
Dilution : 1 : 5000

Figure 5F

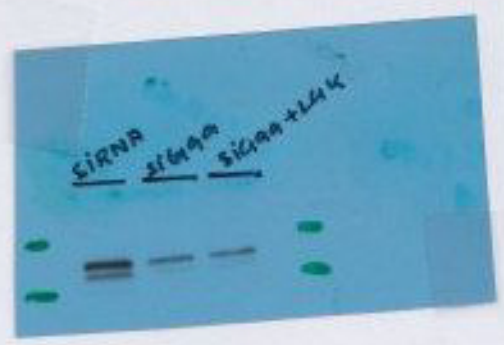

Primary Ab: G19a  
Dilution: 1:300  
Secondary Ab: Rabbit  
Dilution: 1:5000

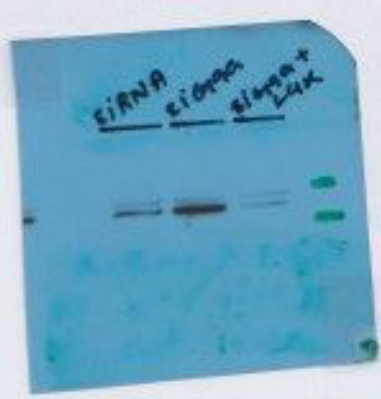

Primary Ab: A- $\beta$ -catenin  
Dilution: 1:500  
Secondary Ab: Mouse  
Dilution: 1:5000

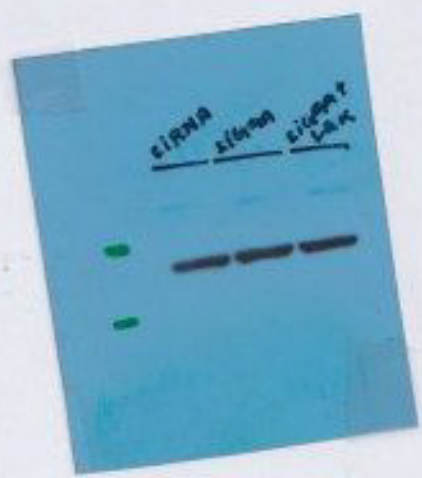

Primary Ab:  $\beta$ -actin  
Dilution: 1:10000  
Secondary Ab: Mouse  
Dilution: 1:5000

Figure 5G

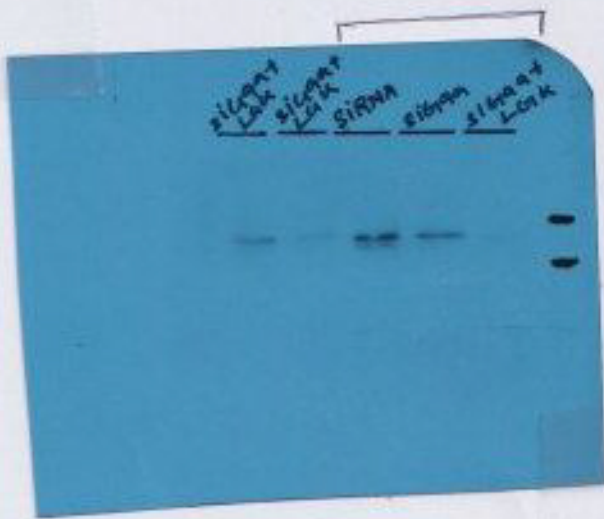

Primary Ab: G9a  
Dilution: 1:300  
Secondary Ab: Rabbit  
Dilution: 1:5000

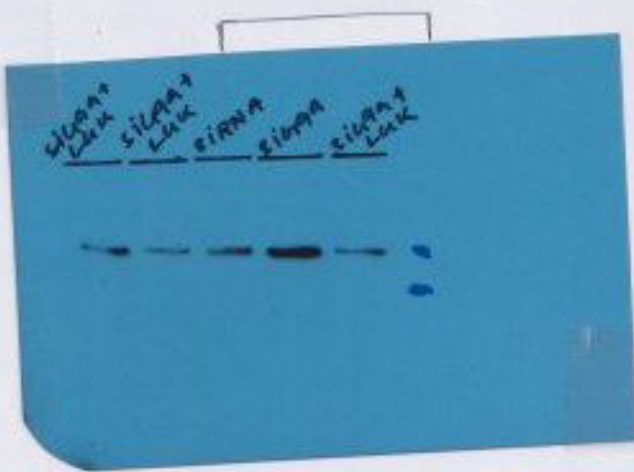

Primary Ab: A-beta-catenin  
Dilution: 1:500  
Secondary Ab: Mouse  
Dilution: 1:5000

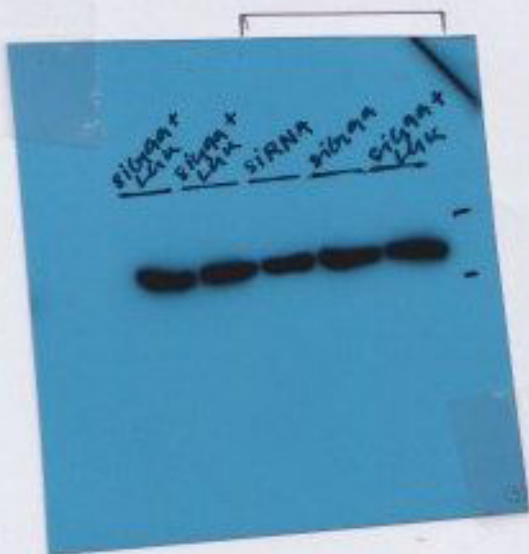

Primary Ab: beta-actin  
Dilution: 1:10000  
Secondary Ab: Mouse  
Dilution: 1:5000
