# Supplementary figures and images for: EHMT2 epigenetically suppresses Wnt signaling and is a potential target in embryonal rhabdomyosarcoma
Source: eLife journal article supplement (doi:10.7554/elife.57683), 2020-11-30

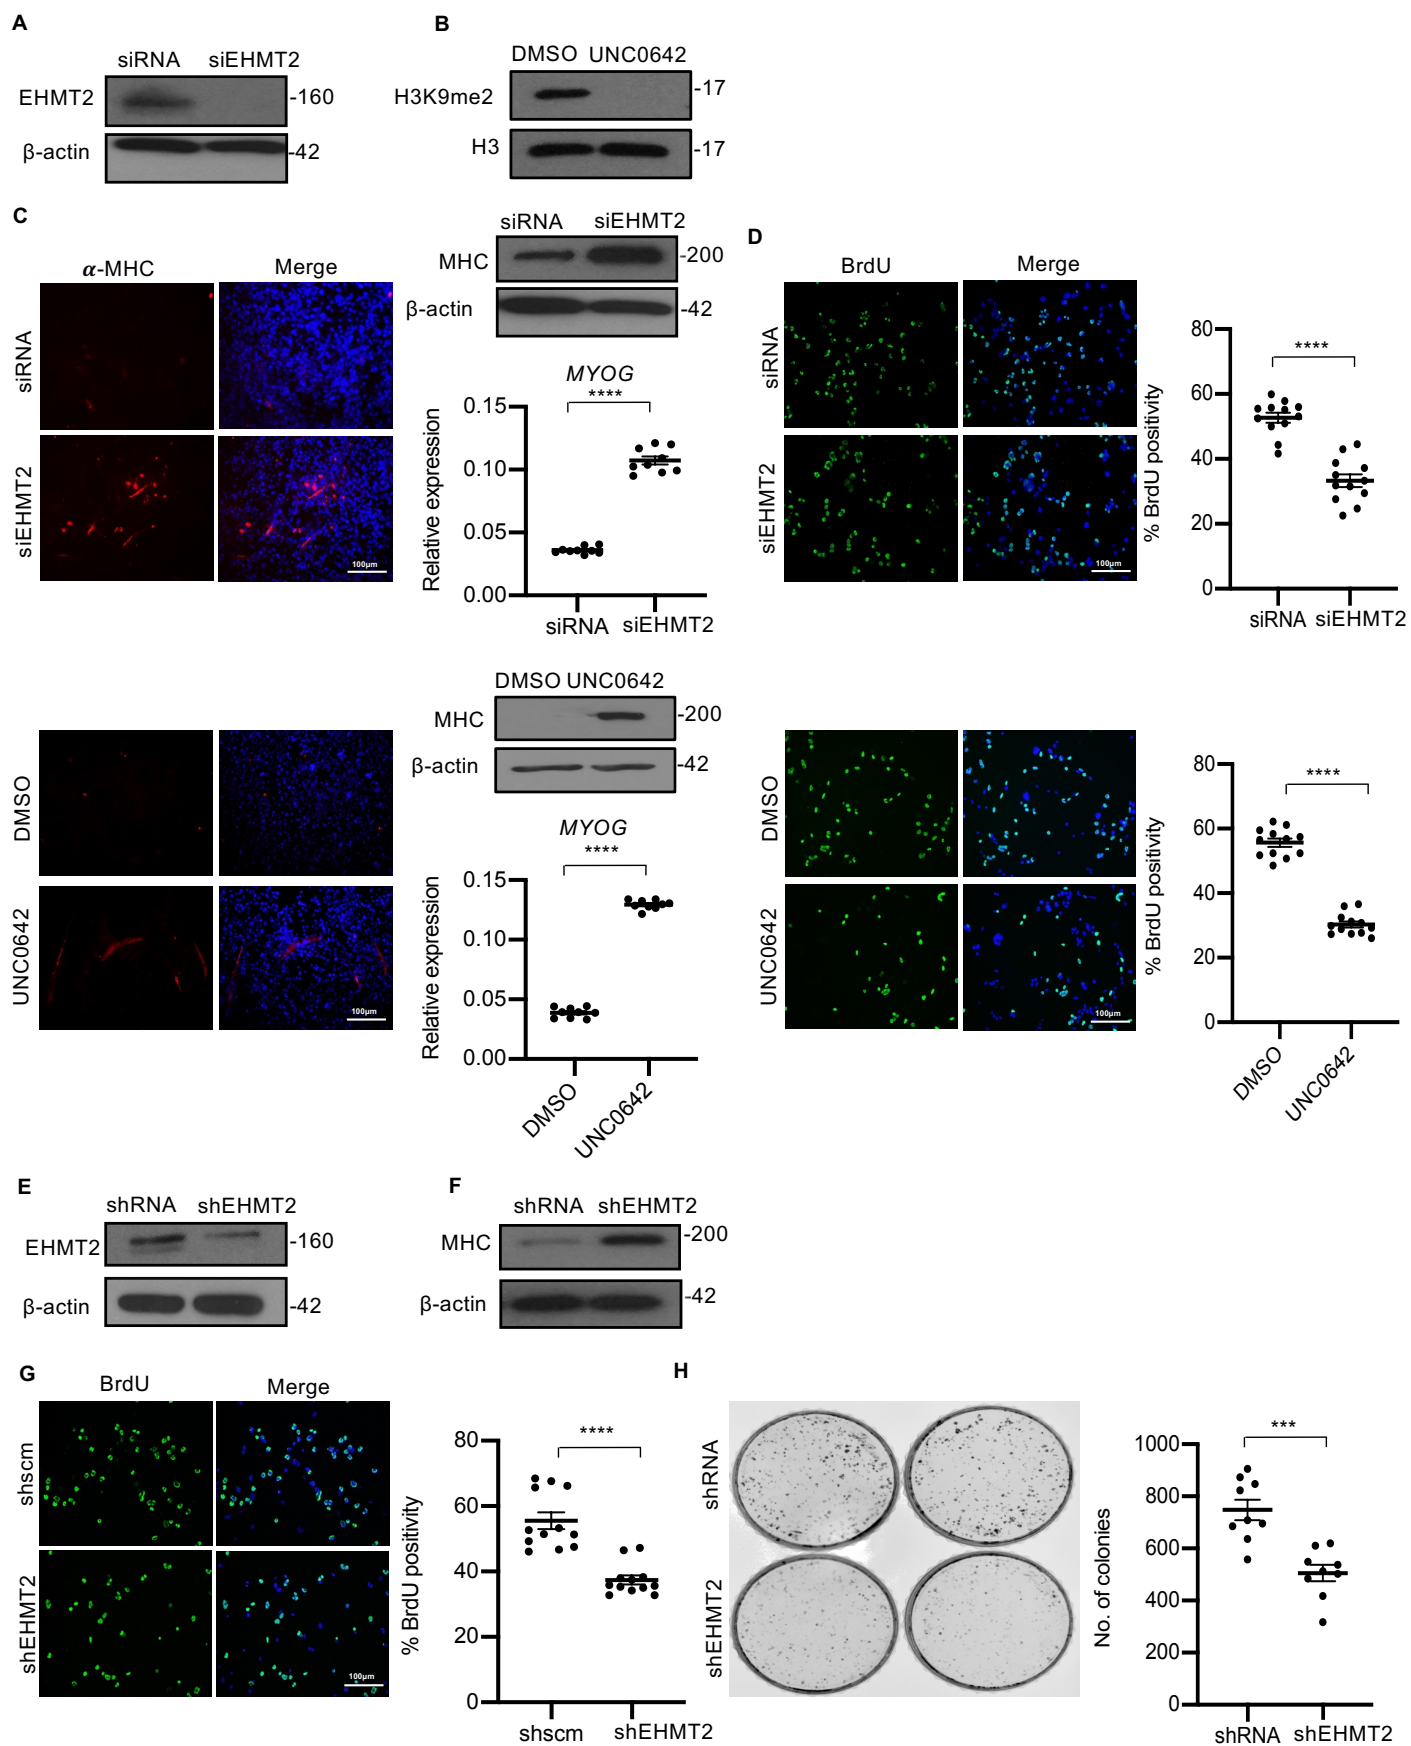

Figure 2-figure supplement 2 Pal et. al

Supplement: supp [file elife-57683-supp-v1.zip]

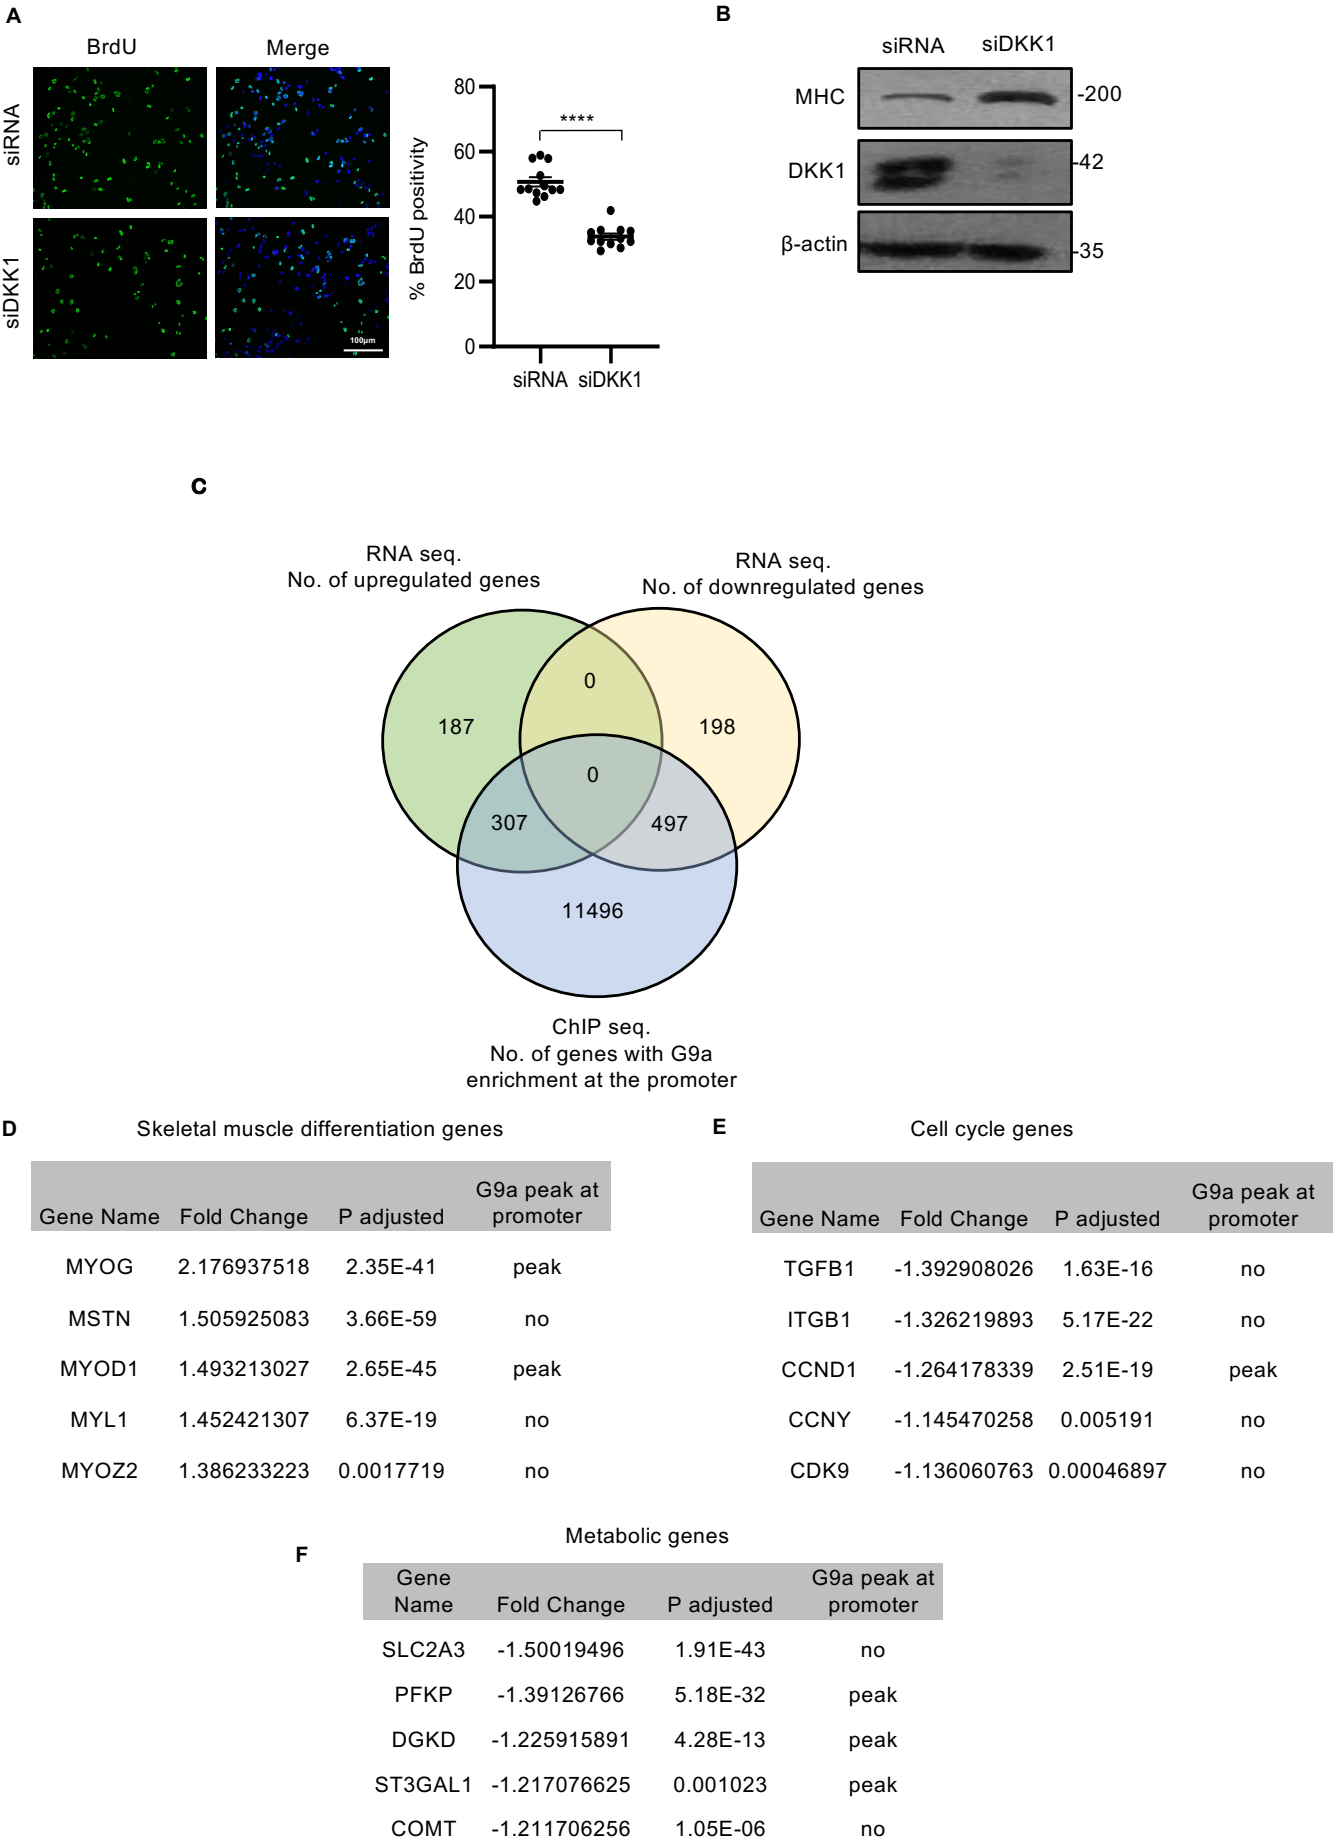

Figure 5-figure supplement 1 Pal et. al

Supplement: supp [file elife-57683-supp-v1.zip]

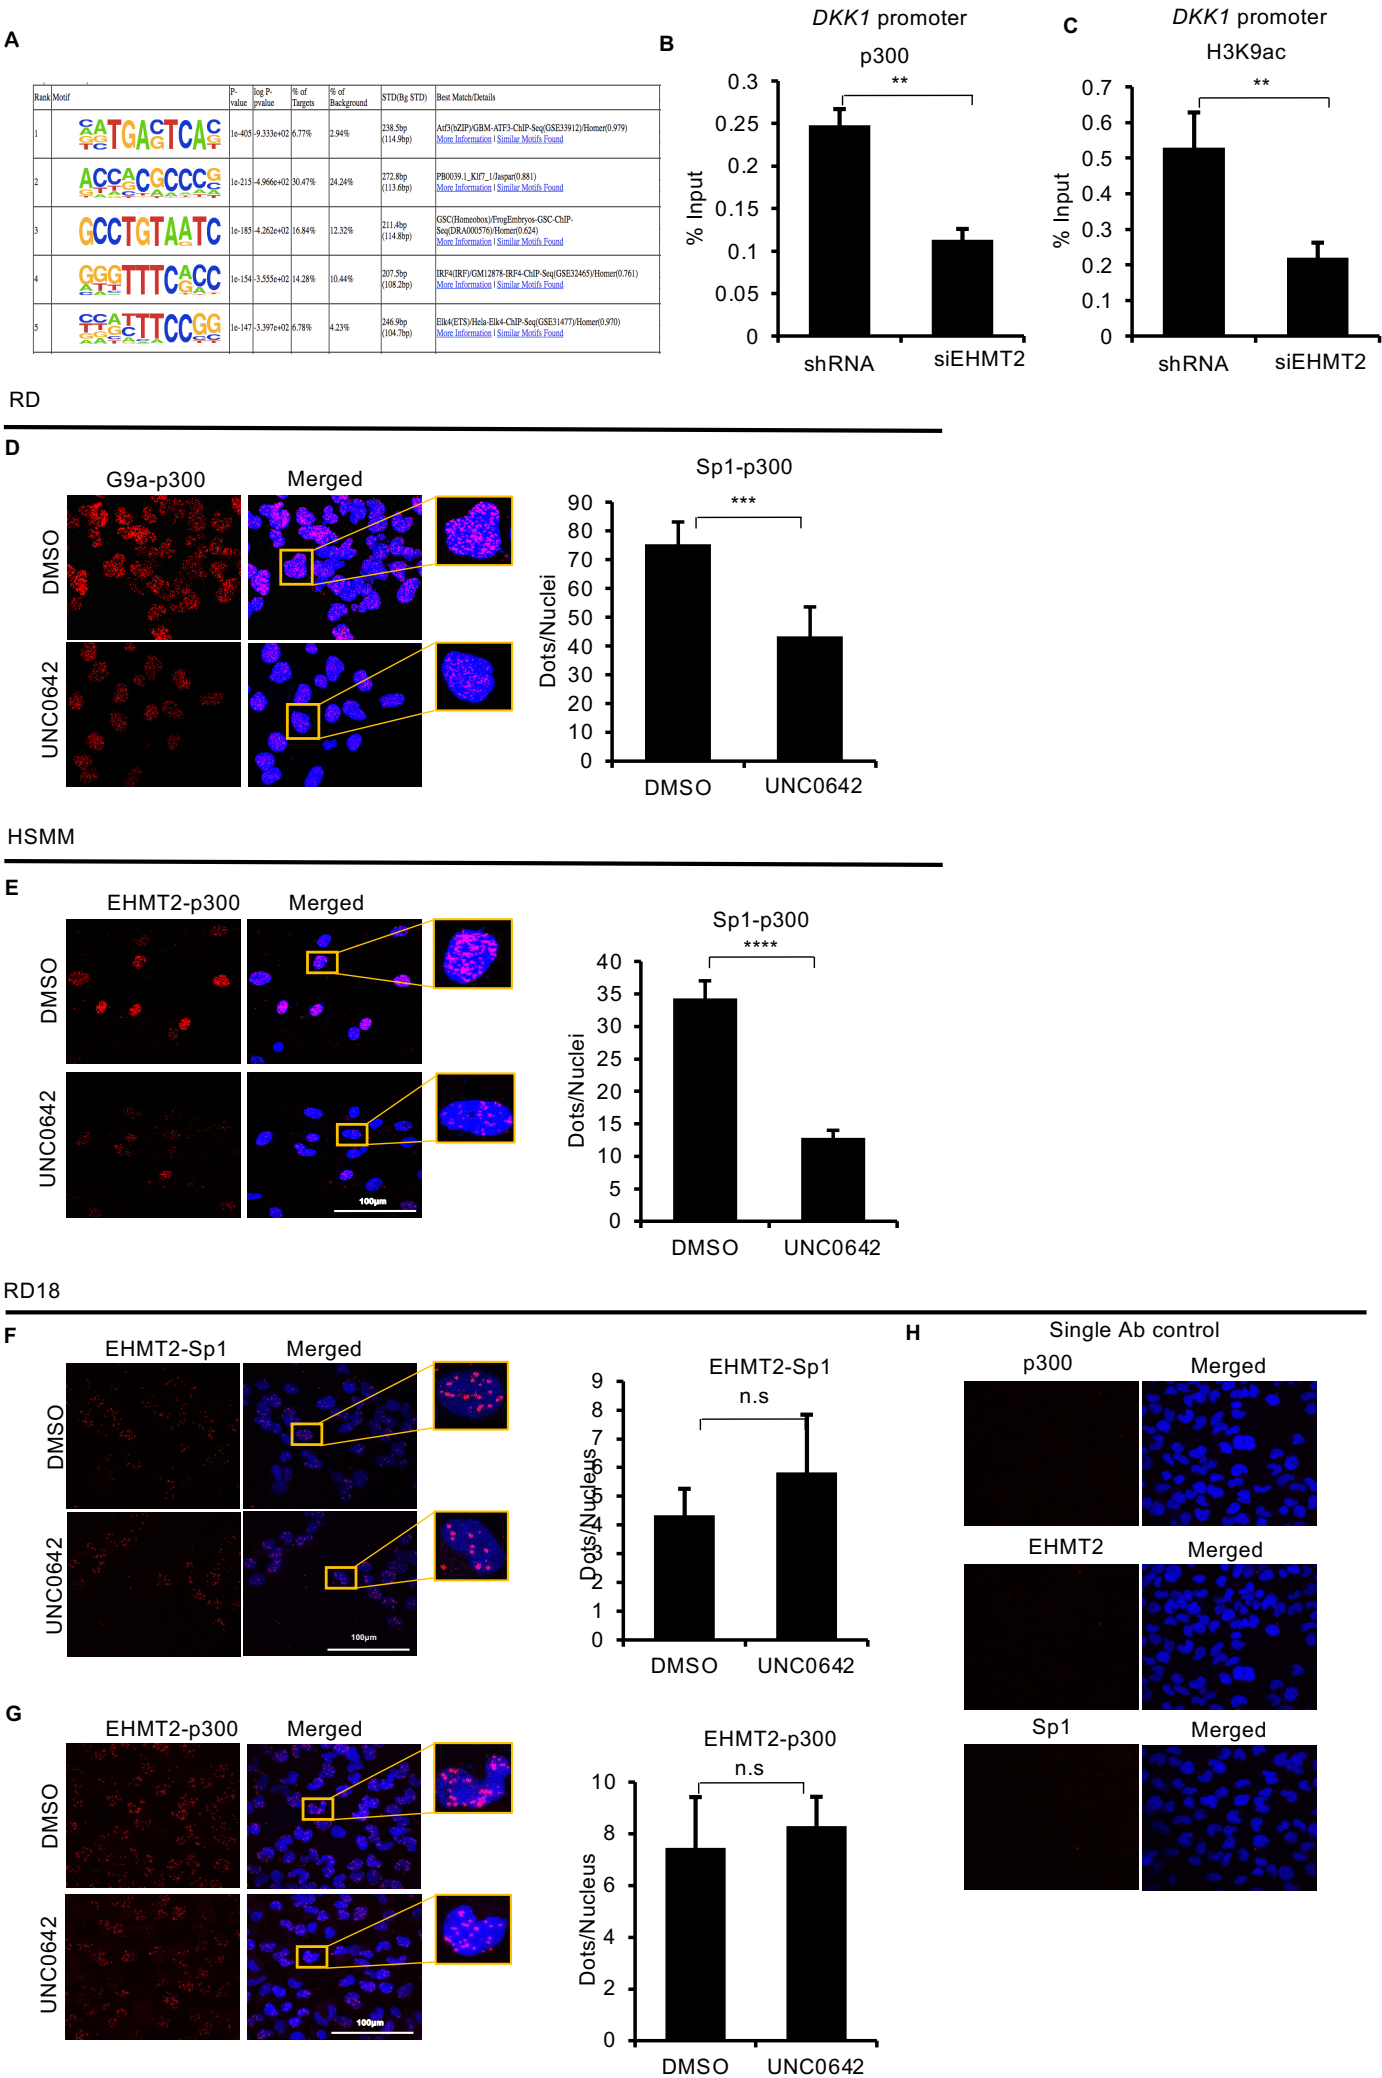

Figure 4-figure supplement 1 Pal et. al

Supplement: supp [file elife-57683-supp-v1.zip]

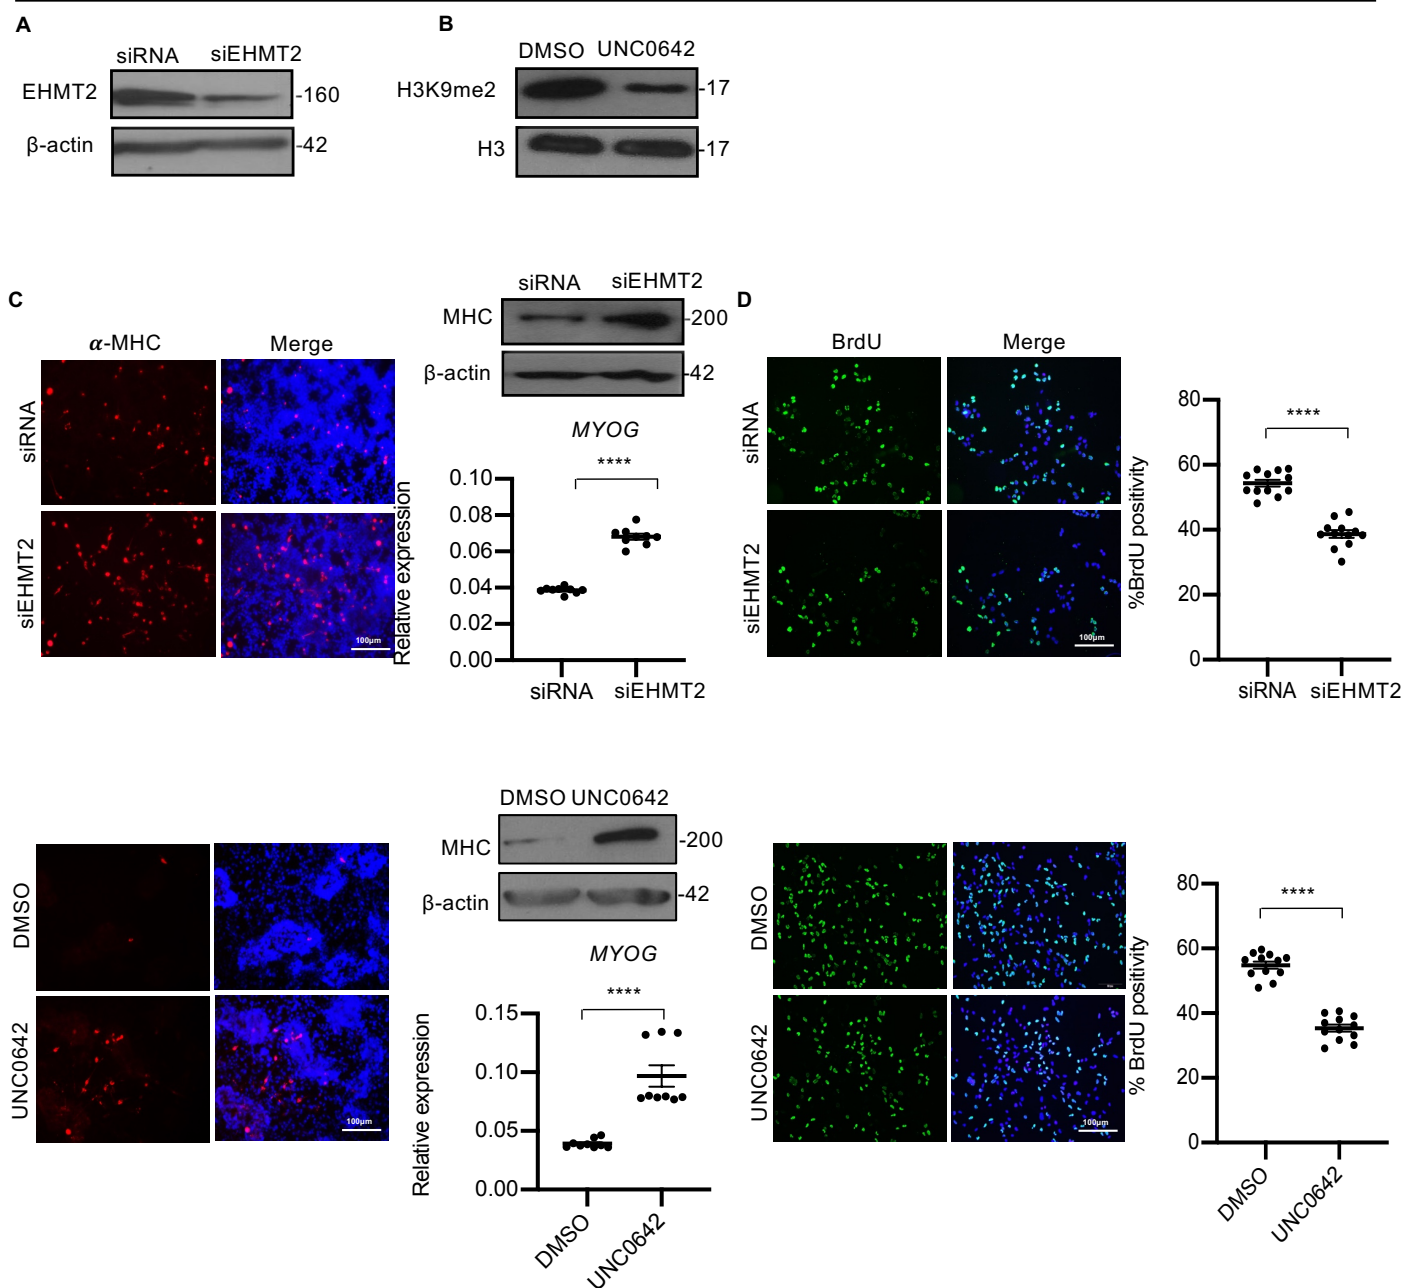

Figure 2-figure supplement 1 Pal et. al

Supplement: supp [file elife-57683-supp-v1.zip]

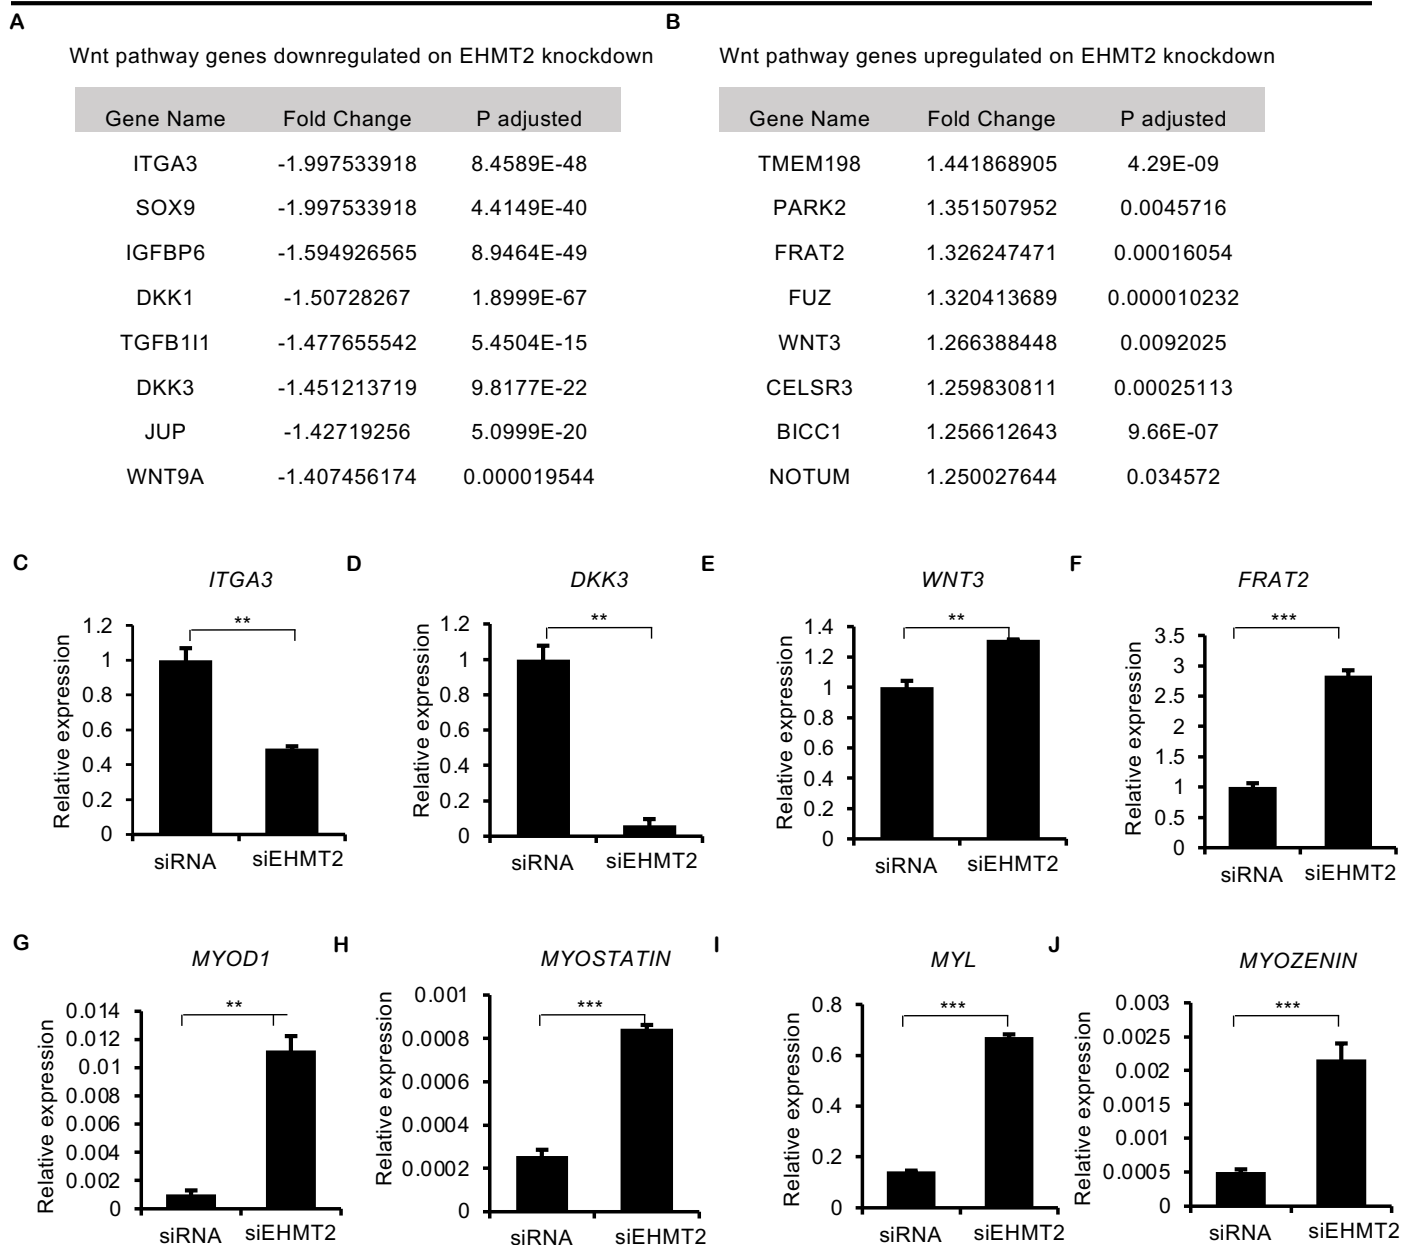

Figure 3-figure supplement 1 Pal et. al

Supplement: supp [file elife-57683-supp-v1.zip]
